# Supplementary material for: Cholinesterase Inhibition and Antioxidative Capacity of New Heteroaromatic Resveratrol Analogs: Synthesis and Physico-Chemical Properties
Source: Preprints.org preprint supplement (doi:10.20944/preprints202406.1627.v1), 2024-06-24
Supplement: Supplementary file 1 [file supplementary]

**Cholinesterase inhibition and antioxidative capacity of new heteroaromatic resveratrol analogs: synthesis and physico-chemical properties**

**Milena Mlakić 1, Ilijana Odak 2, Danijela Barić 3, Ivana Šagud 4, Stanislava Talić 2,***

**and Irena Škorić 1,***

1 Department of Organic Chemistry, Faculty of Chemical Engineering and Technology, University of Zagreb, Marulićev trg 19, HR-10 000 Zagreb, Croatia; mdragojev@fkit.unizg.hr (M.M.)

2 Department of Chemistry, Faculty of Science and Education, University of Mostar, Matice hrvatske bb, 88 000 Mostar, Bosnia and Herzegovina; ilijana.odak@fpmoz.sum.ba (I.O.)

3 Group for Computational Life Sciences, Division of Physical Chemistry, Ruđer Bošković Institute, Bijenička cesta 54, HR-10 000 Zagreb, Croatia; dbaric@irb.hr (D.B.)

4 Croatian Agency for Medicinal Products and Medical Devices, Ksaverska Cesta 4, HR-10 000 Zagreb, Croatia; Ivana.Sagud@halmed.hr (I.S.)

* Correspondence: Prof Stanislava Talić; stanislava.talic@fpmoz.sum.ba (S.T.); Prof Irena Škorić; iskoric@fkit.unizg.hr (I.Š.)

Supplementary Data

**Contents**

1. NMR spectra of compounds **1**–**14**………………………………………………………...…….……..2
2. Mass spektra and HRMS analyses of compounds **1–14**…………………………..……...………..59
3. UV spectra of compounds **11–14**…………………………………………………………………….73
4. Cartesian coordinates of docked ligands……………………………………………………………75
5. Tables S1 and S2, free energies of binding obtained by docking…………………………………77
6. Docked molecule **6**…………………………………………………………………………………….78
7. NMR spectra of compounds **1–14**

**Figure S1.** 1H NMR (CDCl3) spectrum of **1**.

**Figure S2. P**art of 1H NMR (CDCl3) spectrum of **1**.

**
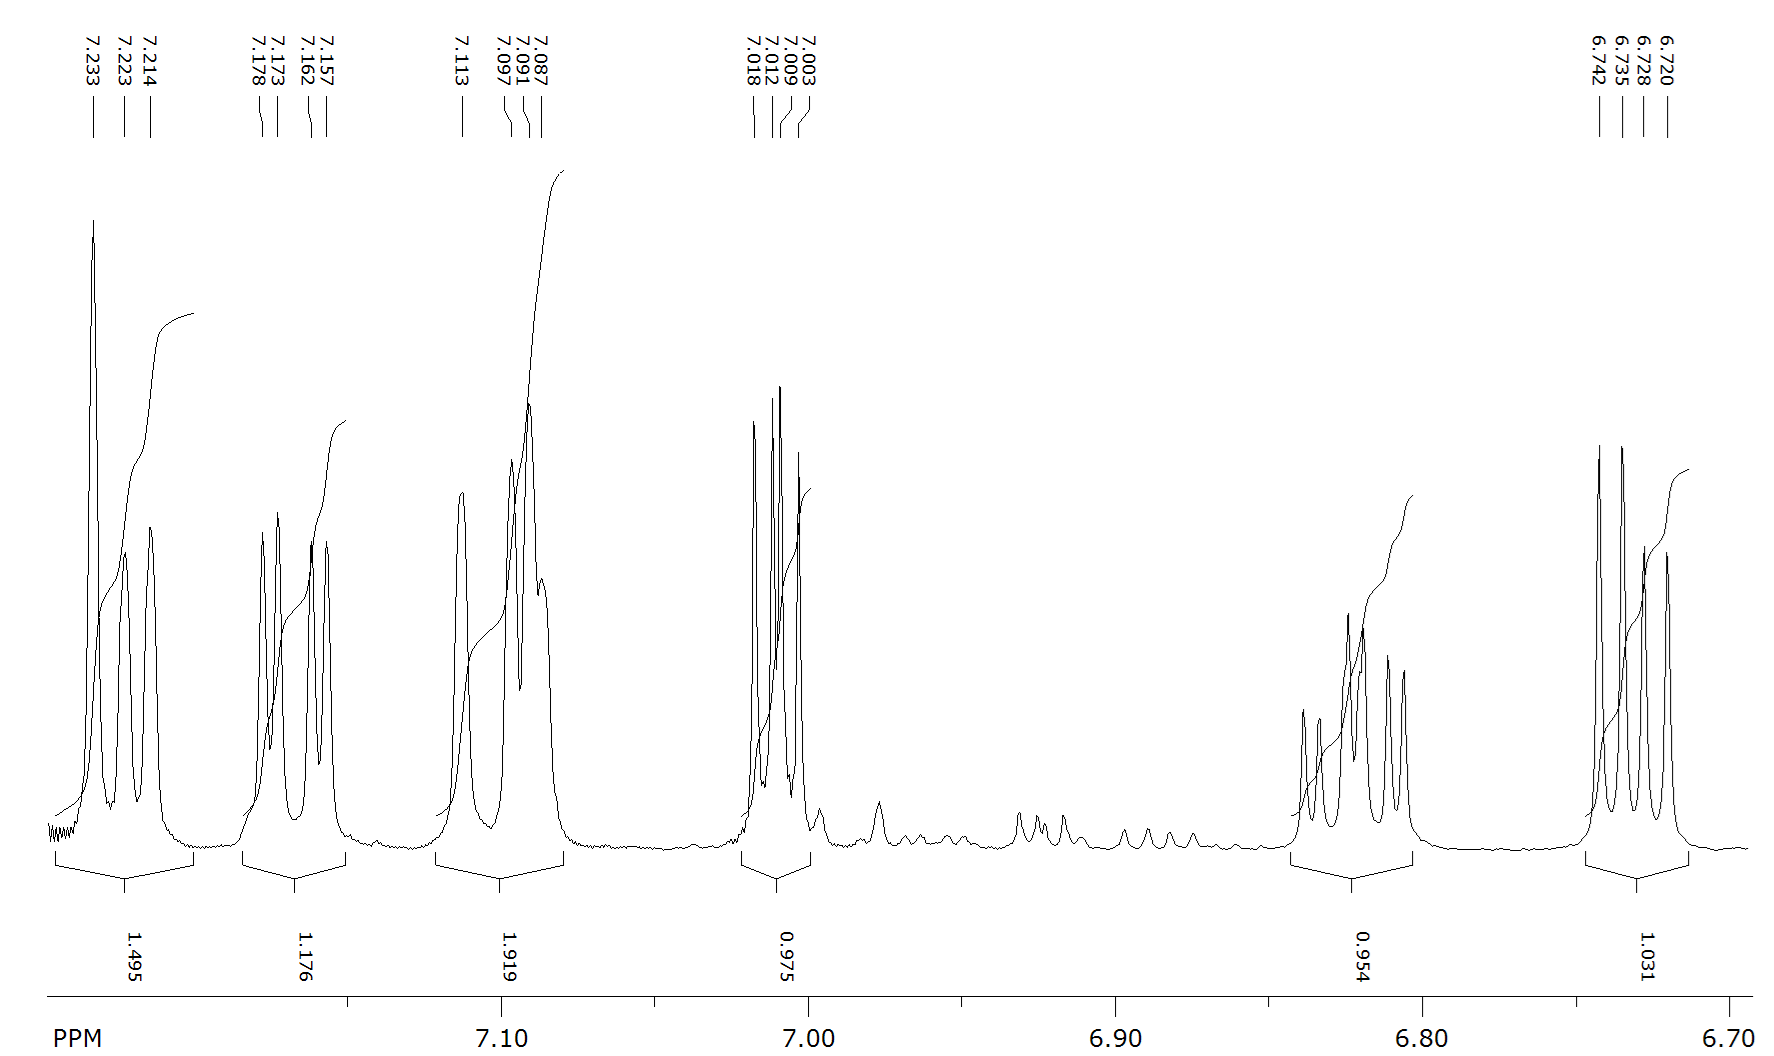
**

**Figure S3. A**romatic part of 1H NMR (CDCl3) spectrum of **1**.

**Figure S4.** 13C NMR (CDCl3) spectrum of **1**.

**Figure S5.** Aromatic part of 13C NMR (CDCl3) spectrum of **1**.

**Figure S6.** 1H NMR (CDCl3) spectrum of **2**.

**Figure S7. P**art of 1H NMR (CDCl3) spectrum of **2**.

**Figure S8.** 13C NMR (CDCl3) spectrum of **2**.

**Figure S9. A**romatic part of 13C NMR (CDCl3) spectrum of **2**.

**Figure S10.** 1H NMR (CDCl3) spectrum of **3**.

**Figure S11. A**romatic part of 1H NMR (CDCl3) spectrum of **3**.

**Figure S12. A**liphatic part of 1H NMR (CDCl3) spectrum of **3**.

**Figure S13.** 13C NMR (CDCl3) spectrum of **3**.

**Figure S14.** Aromatic part of 13C NMR (CDCl3) spectrum of **3**.

**Figure S15.** 1H NMR (CDCl3) spectrum of **4**.

**Figure S16. A**romatic part of 1H NMR (CDCl3) spectrum of **4**.

**Figure S17. A**liphatic part of 1H NMR (CDCl3) spectrum of **4** (with a small amount of solvent ethanol).

**Figure S18.** 13C NMR (CDCl3) spectrum of **4**.

**Figure S19.** Aromatic part of 13C NMR (CDCl3) spectrum of **4**.

**Figure S20.** 1H NMR (CDCl3) spectrum of **5**.


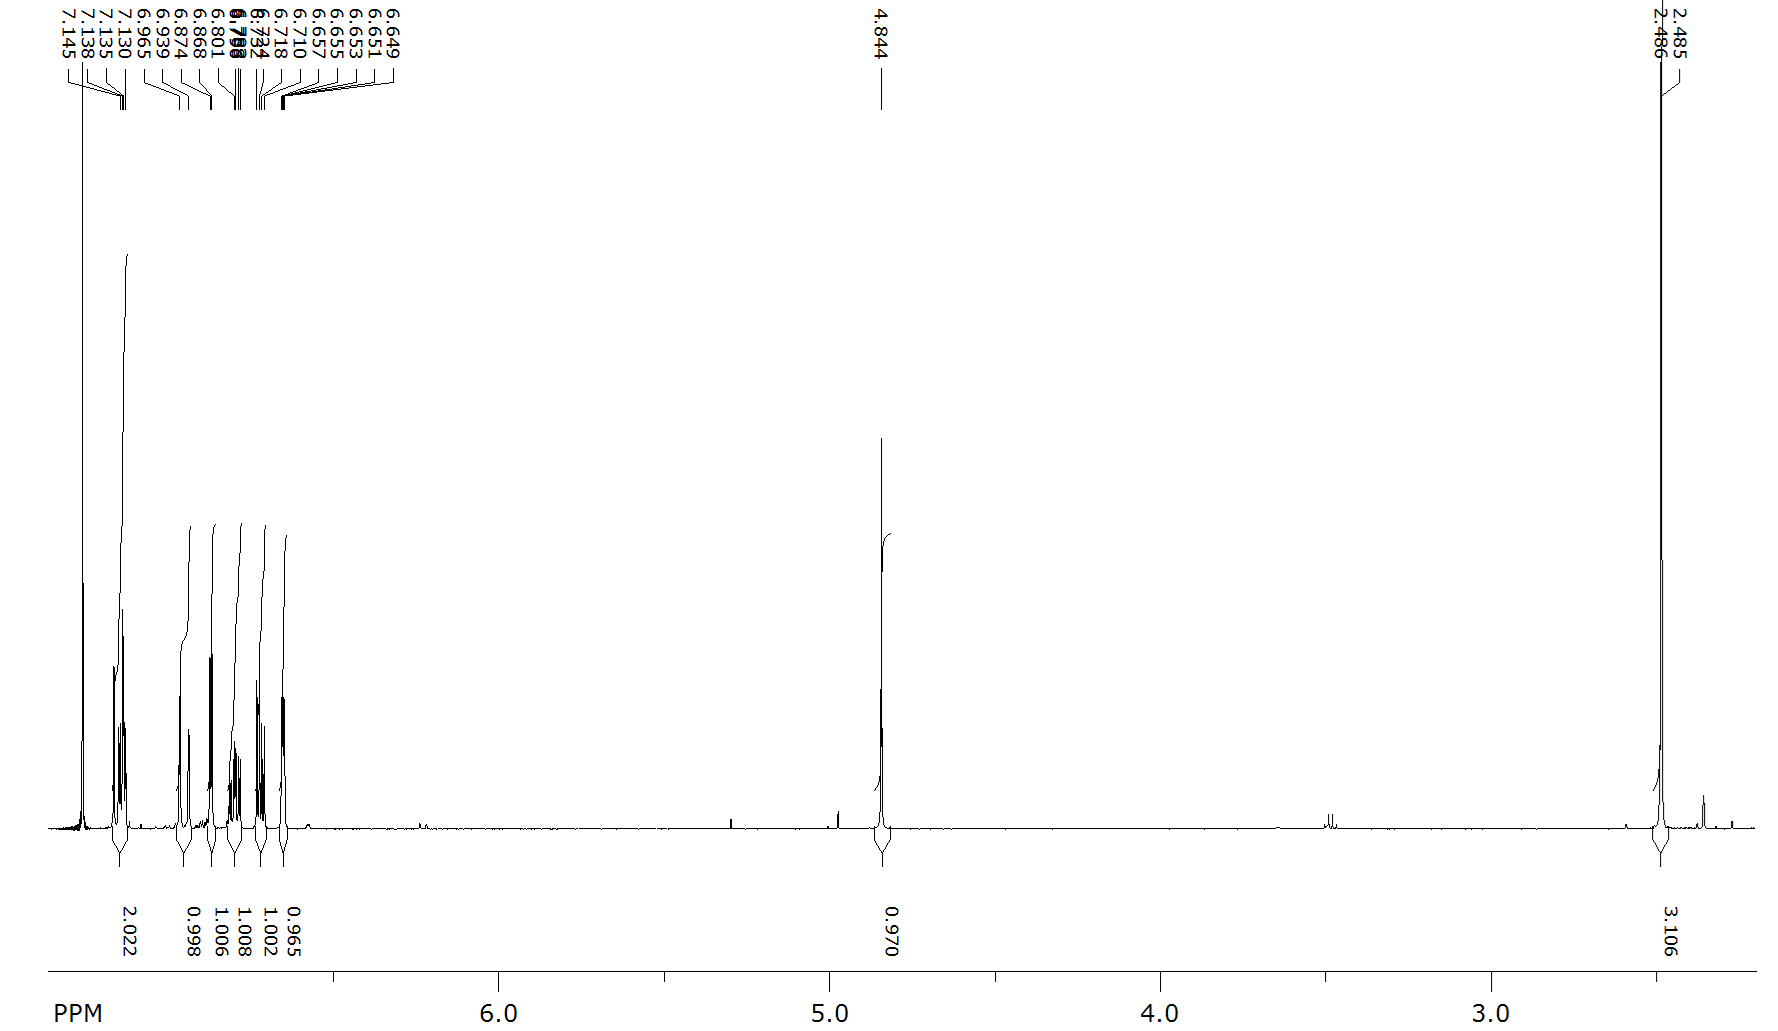


**Figure S21.** Part of 1H NMR (CDCl3) spectrum of **5**.


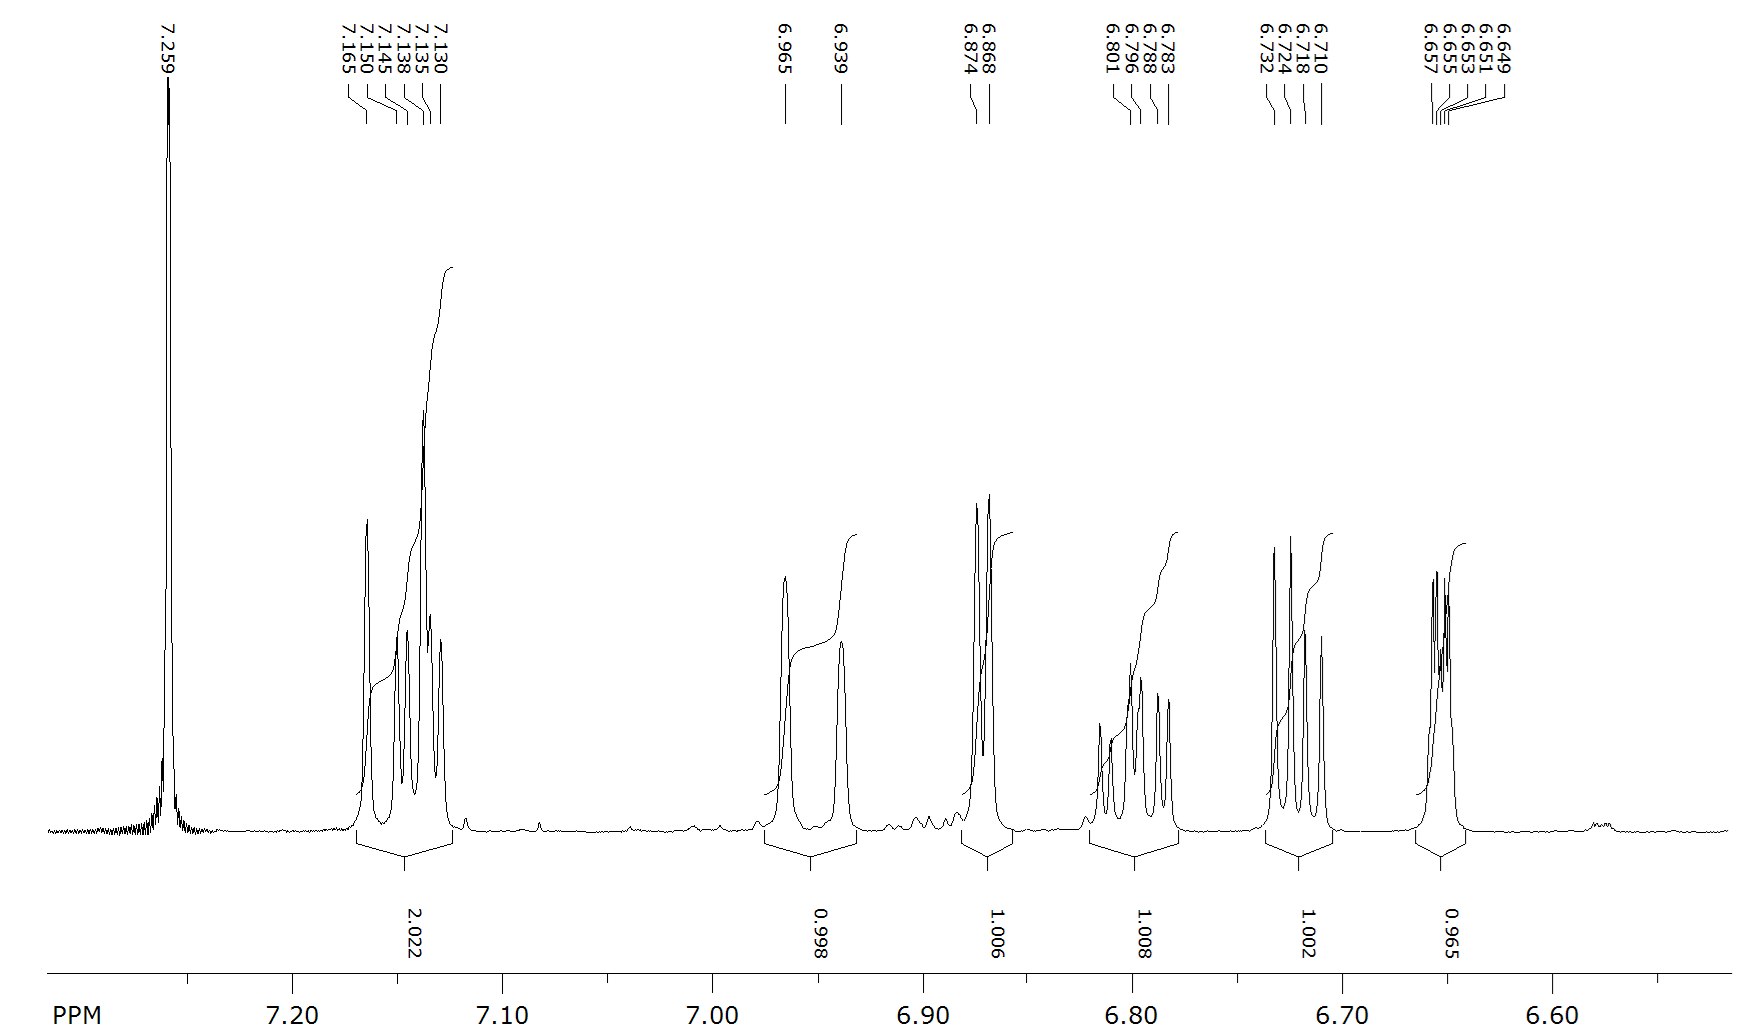


**Figure S22.** Aromatic part of 1H NMR (CDCl3) spectrum of **5**.

**Figure S23.** 13C NMR (CDCl3) spectrum of **5**.


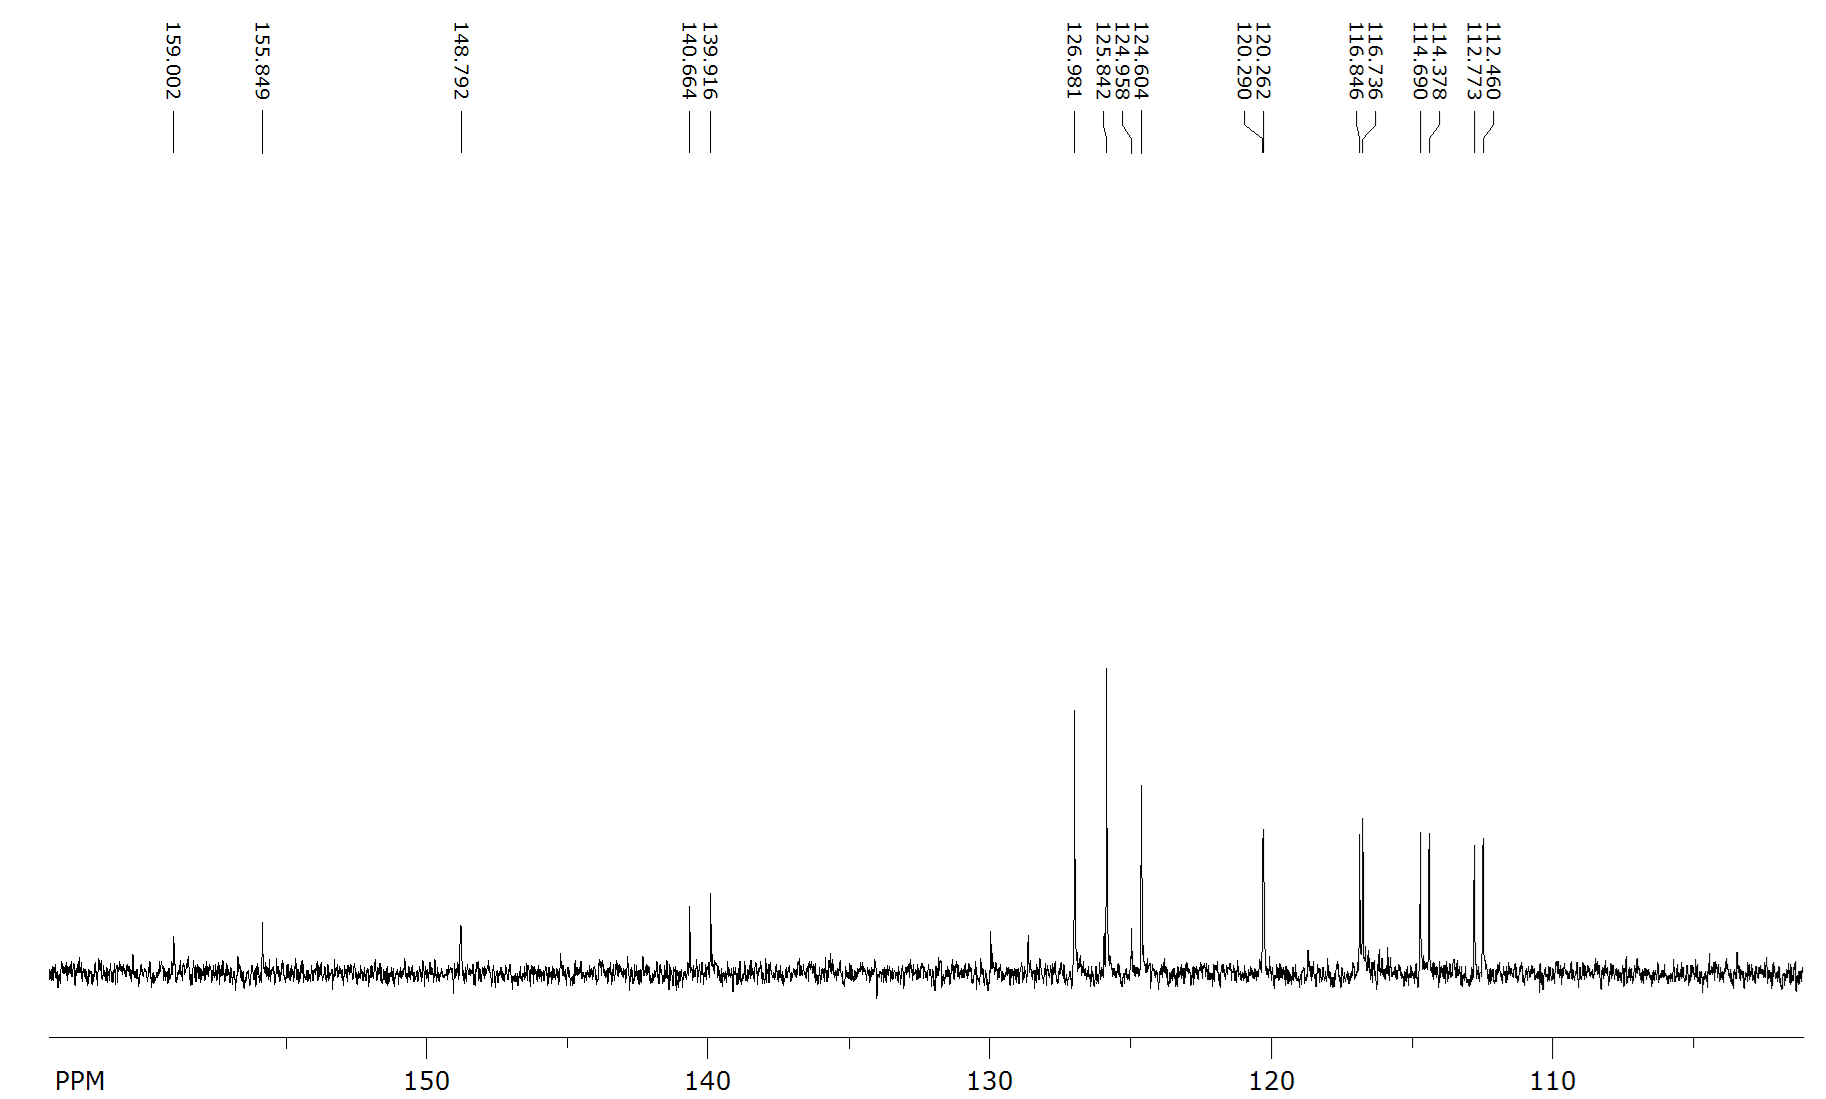


**Figure S24.** 13C NMR (CDCl3) aromatic part of spectrum of **5**.

**Figure S25.** 1H NMR (CDCl3) spectrum of **6**.

**Figure S26.** Part of 1H NMR (CDCl3) spectrum of **6**.

**Figure S27.** Aromatic part of 1H NMR (CDCl3) spectrum of **6**.

**Figure S28.** 13C NMR (CDCl3) spectrum of **6**.

**Figure S29.** Aromatic part of 13C NMR (CDCl3) spectrum of **6**.

**Figure S30.** 1H NMR (CDCl3) spectrum of **7**.

**Figure S31.** Aromatic part of 1H NMR (CDCl3) spectrum of **7**.


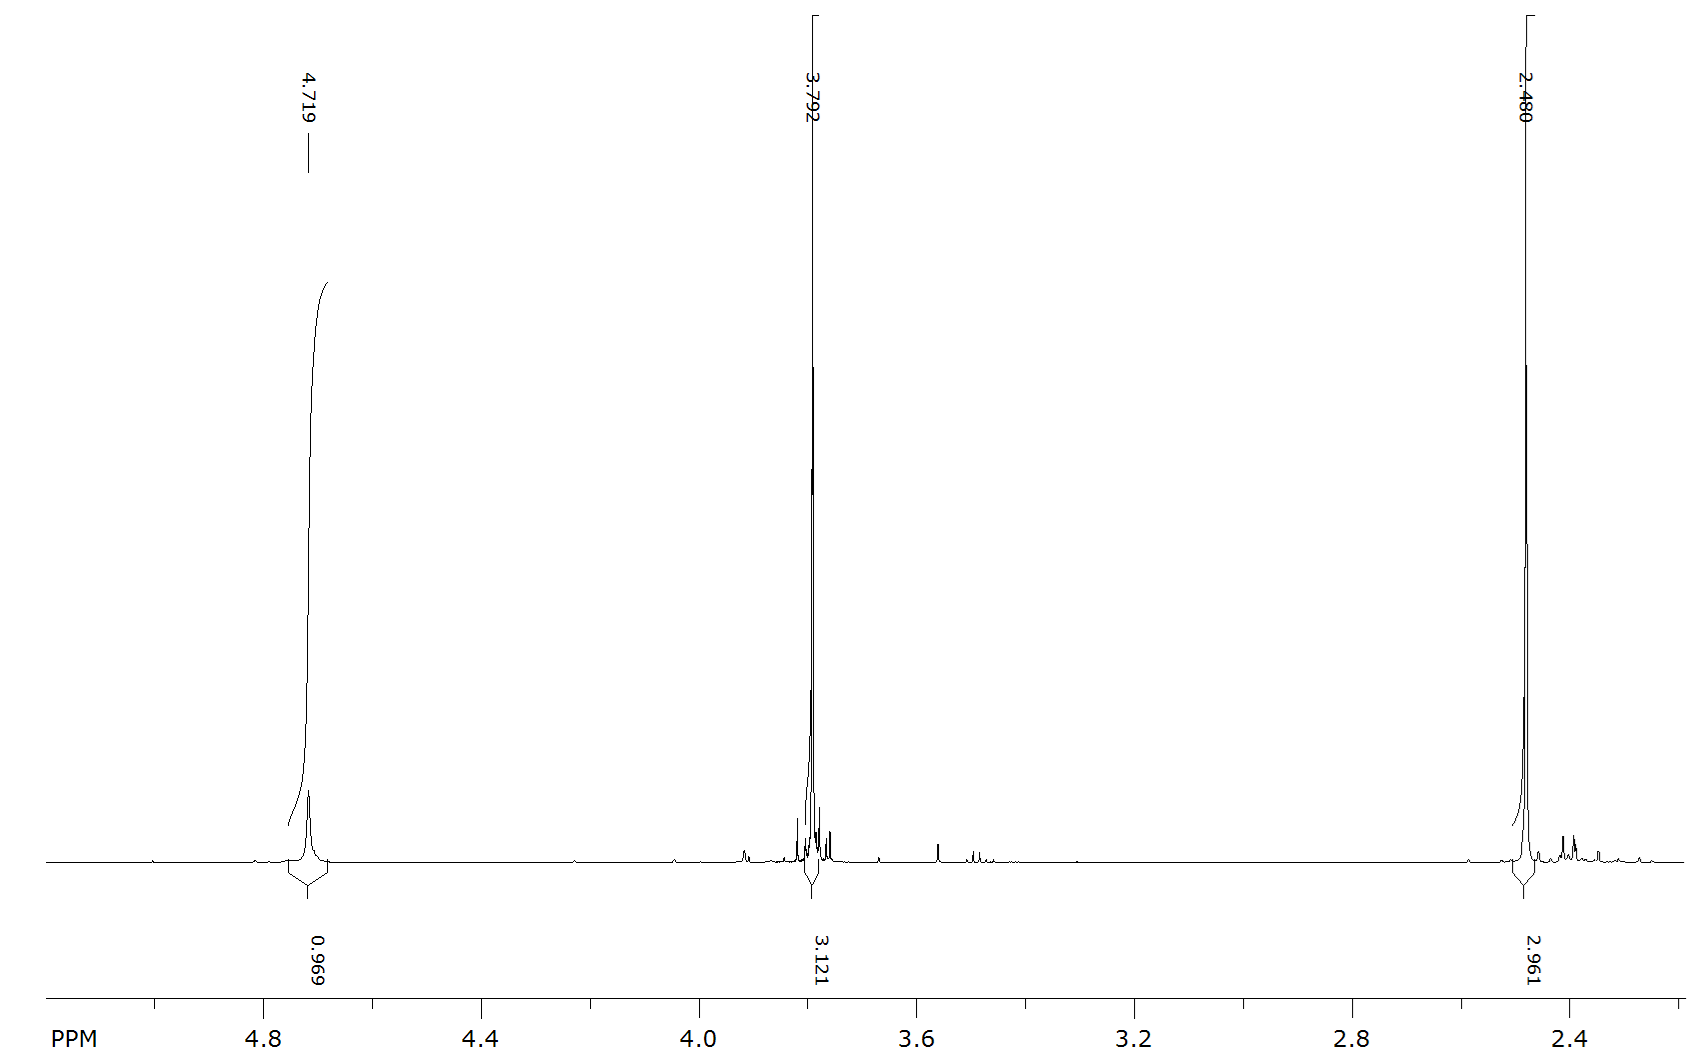


**Figure S32.** Aliphatic part of 1H NMR (CDCl3) spectrum of **7**.

**Figure S33.** 13C NMR (CDCl3) spectrum of **7**.


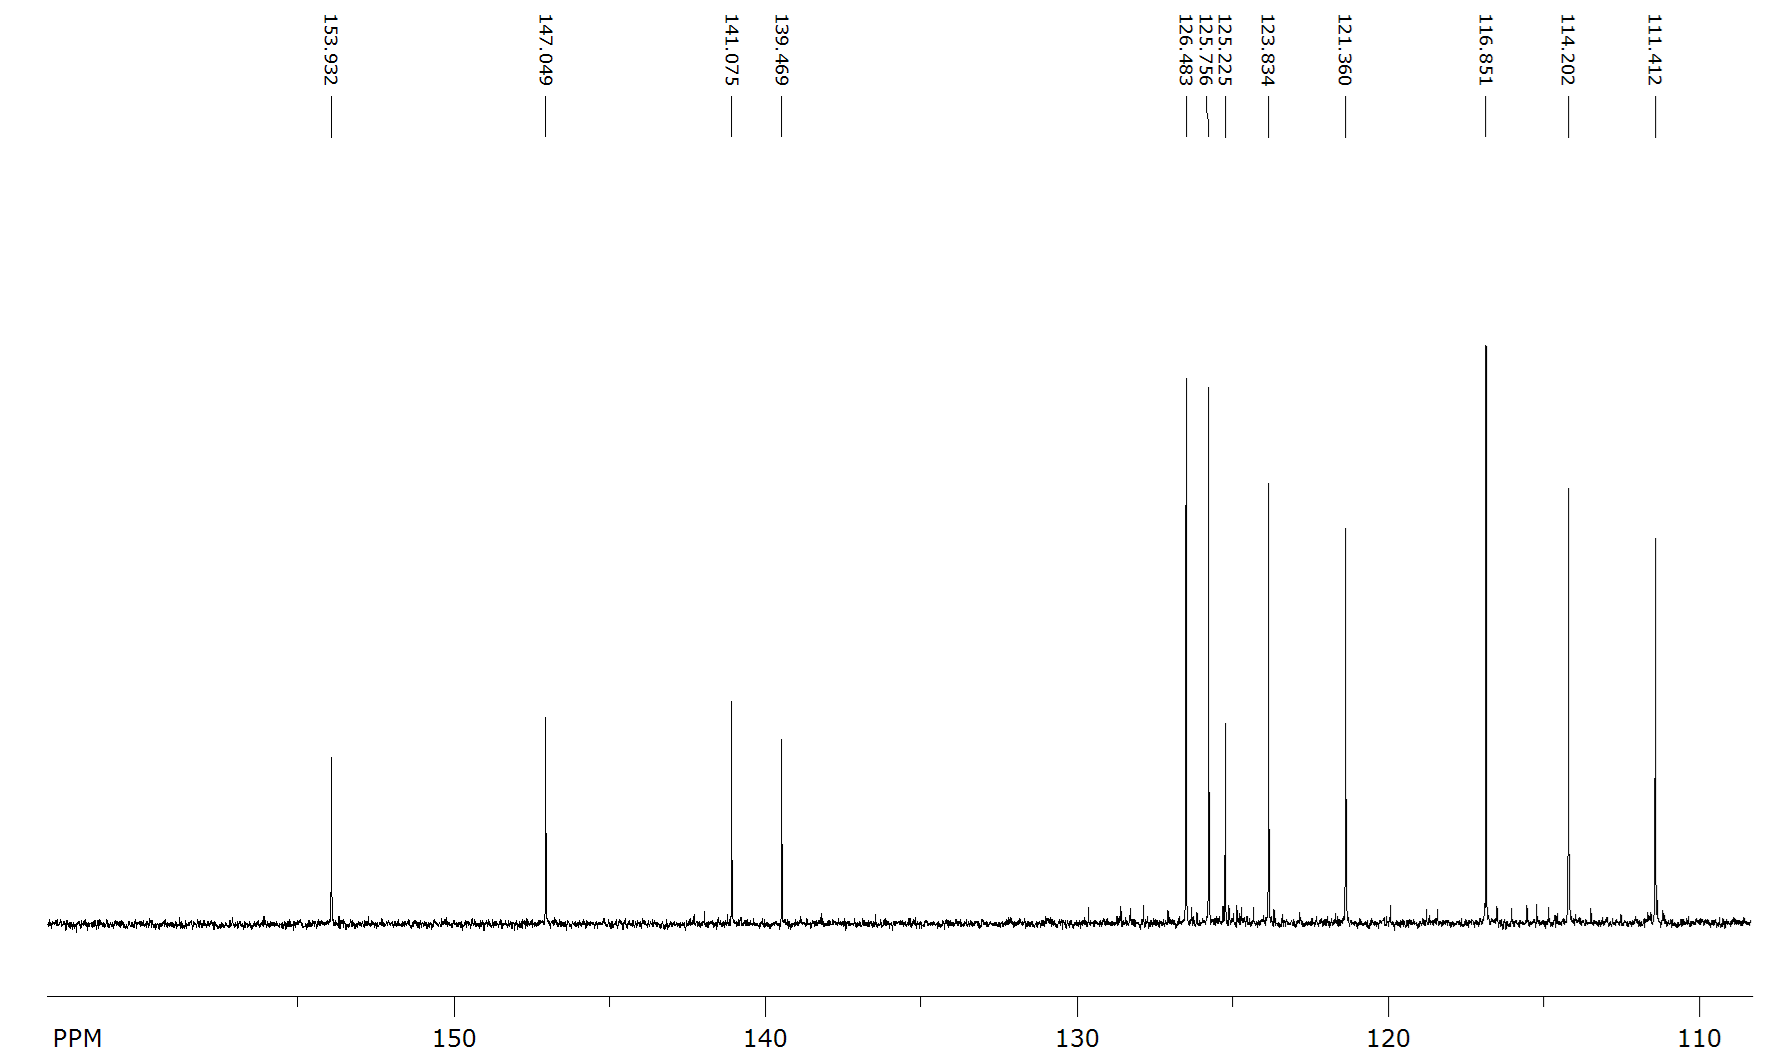


**Figure S34.** Aromatic part of 13C NMR (CDCl3) spectrum of **7**.

**Figure S35.** 1H NMR (CDCl3) spectrum of **8**.


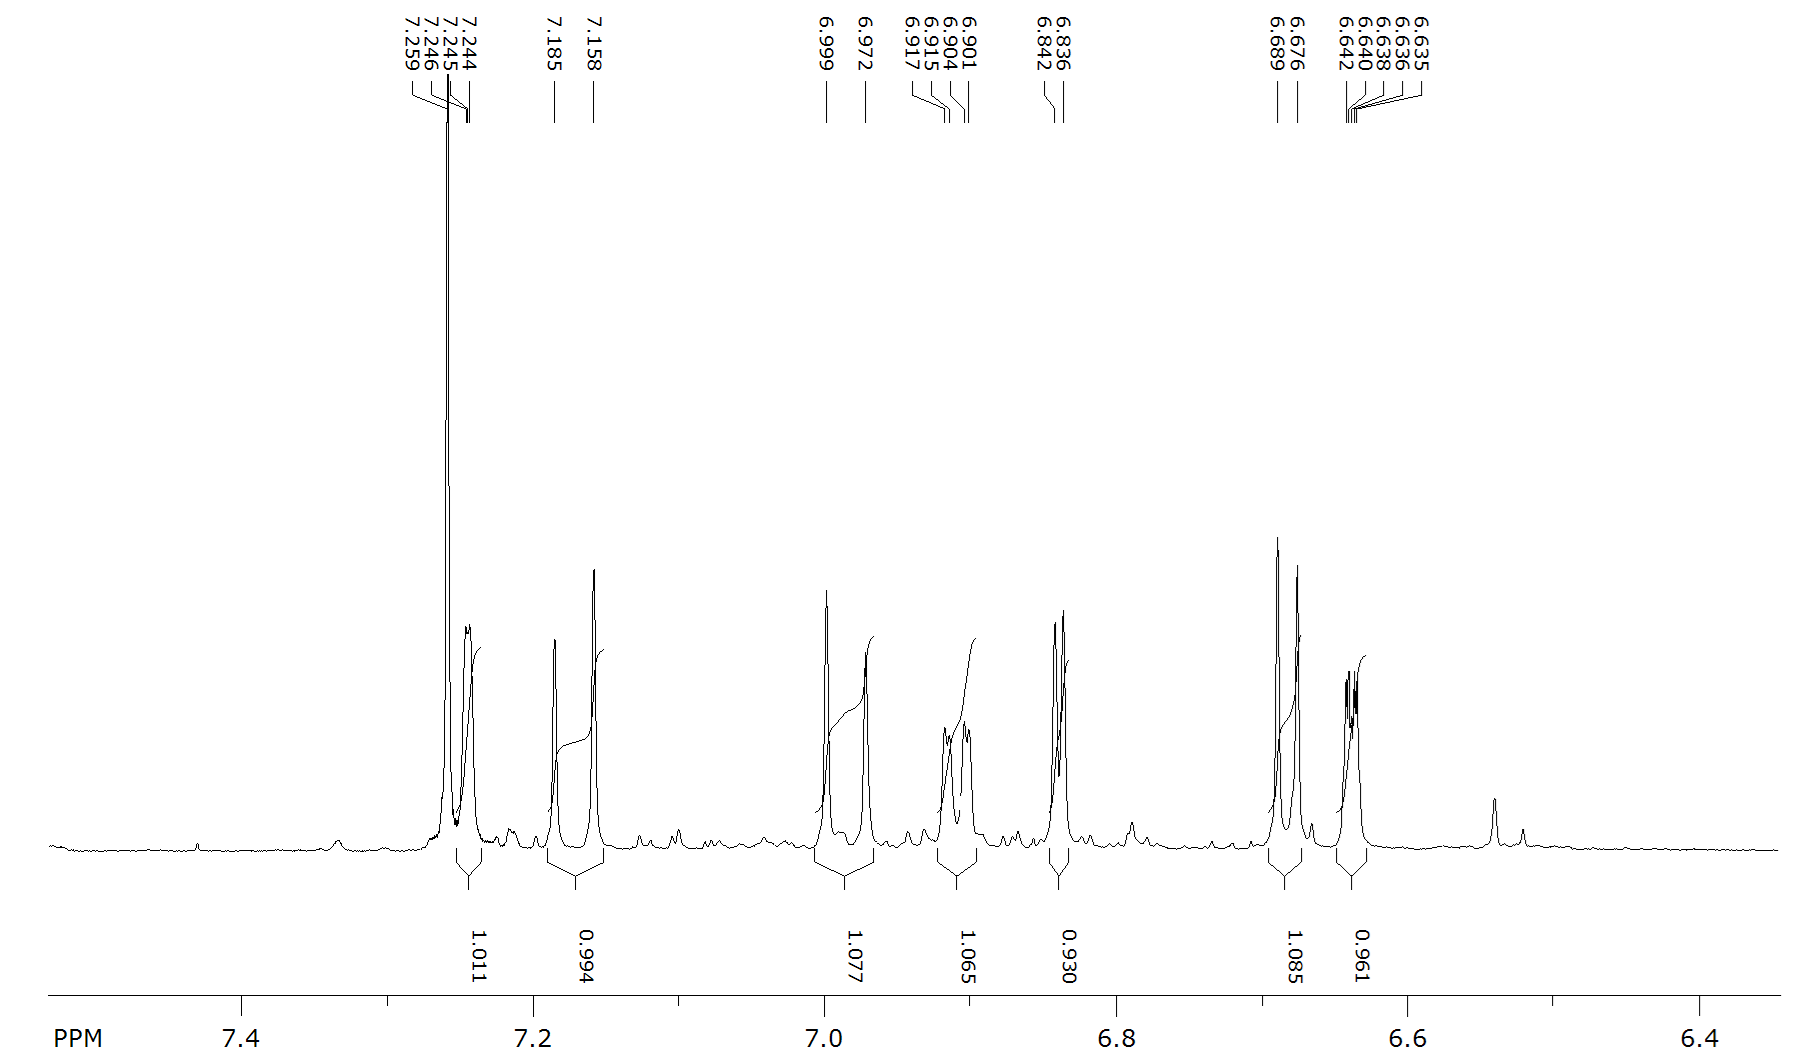


**Figure S36.** Aromatic part of 1H NMR (CDCl3) spectrum of **8**.


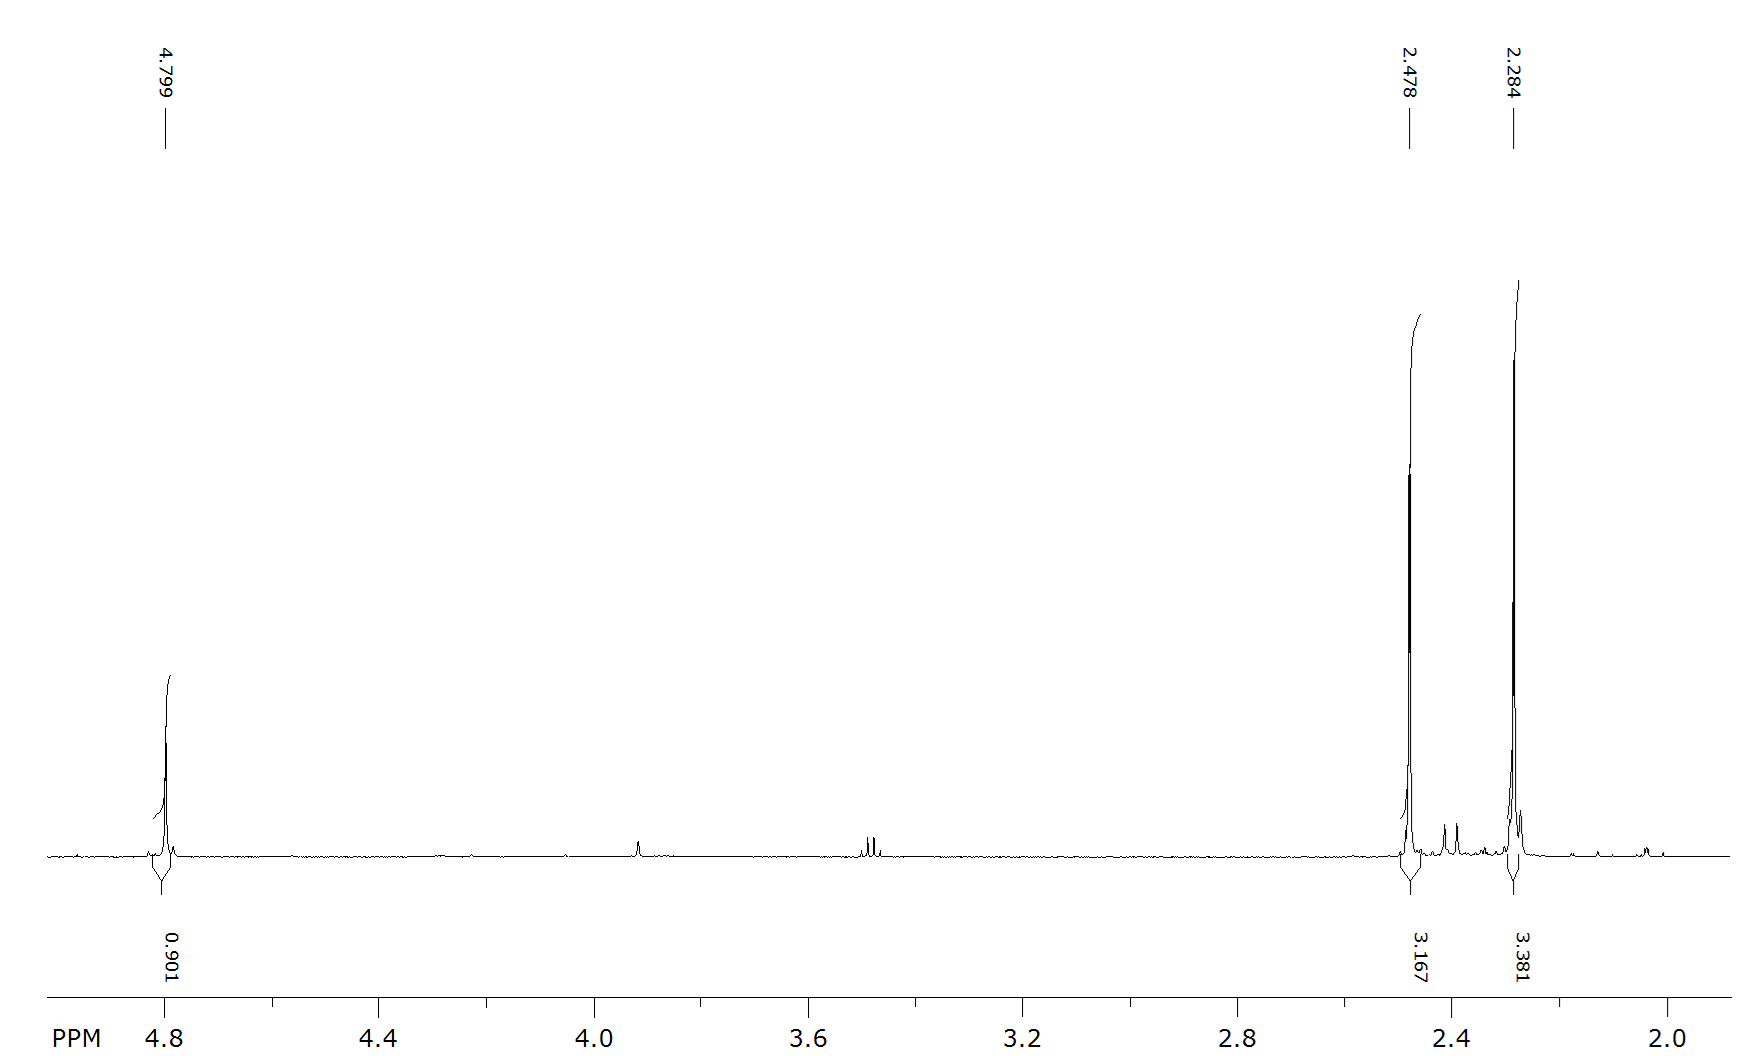


**Figure S37.** Aliphatic part of 1H NMR (CDCl3) spectrum of **8** (with a small amount of solvent ethanol).


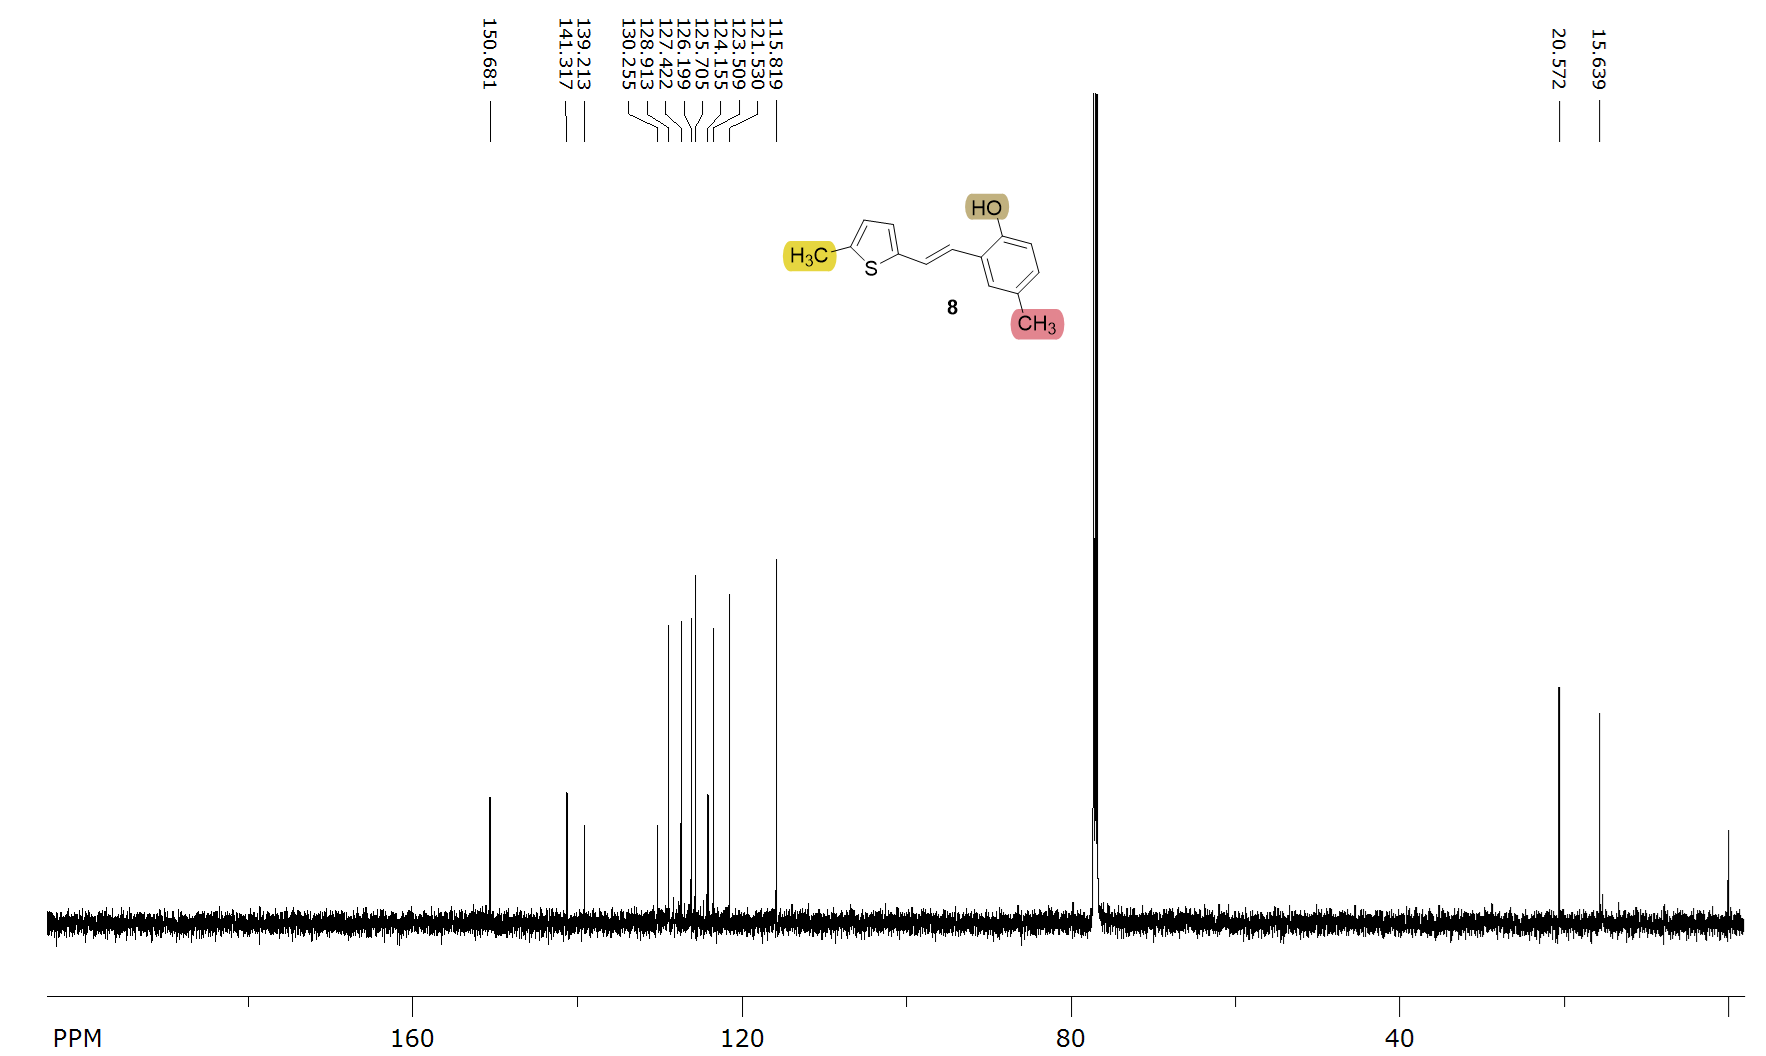


**Figure S38.** 13C NMR (CDCl3) spectrum of **8**.


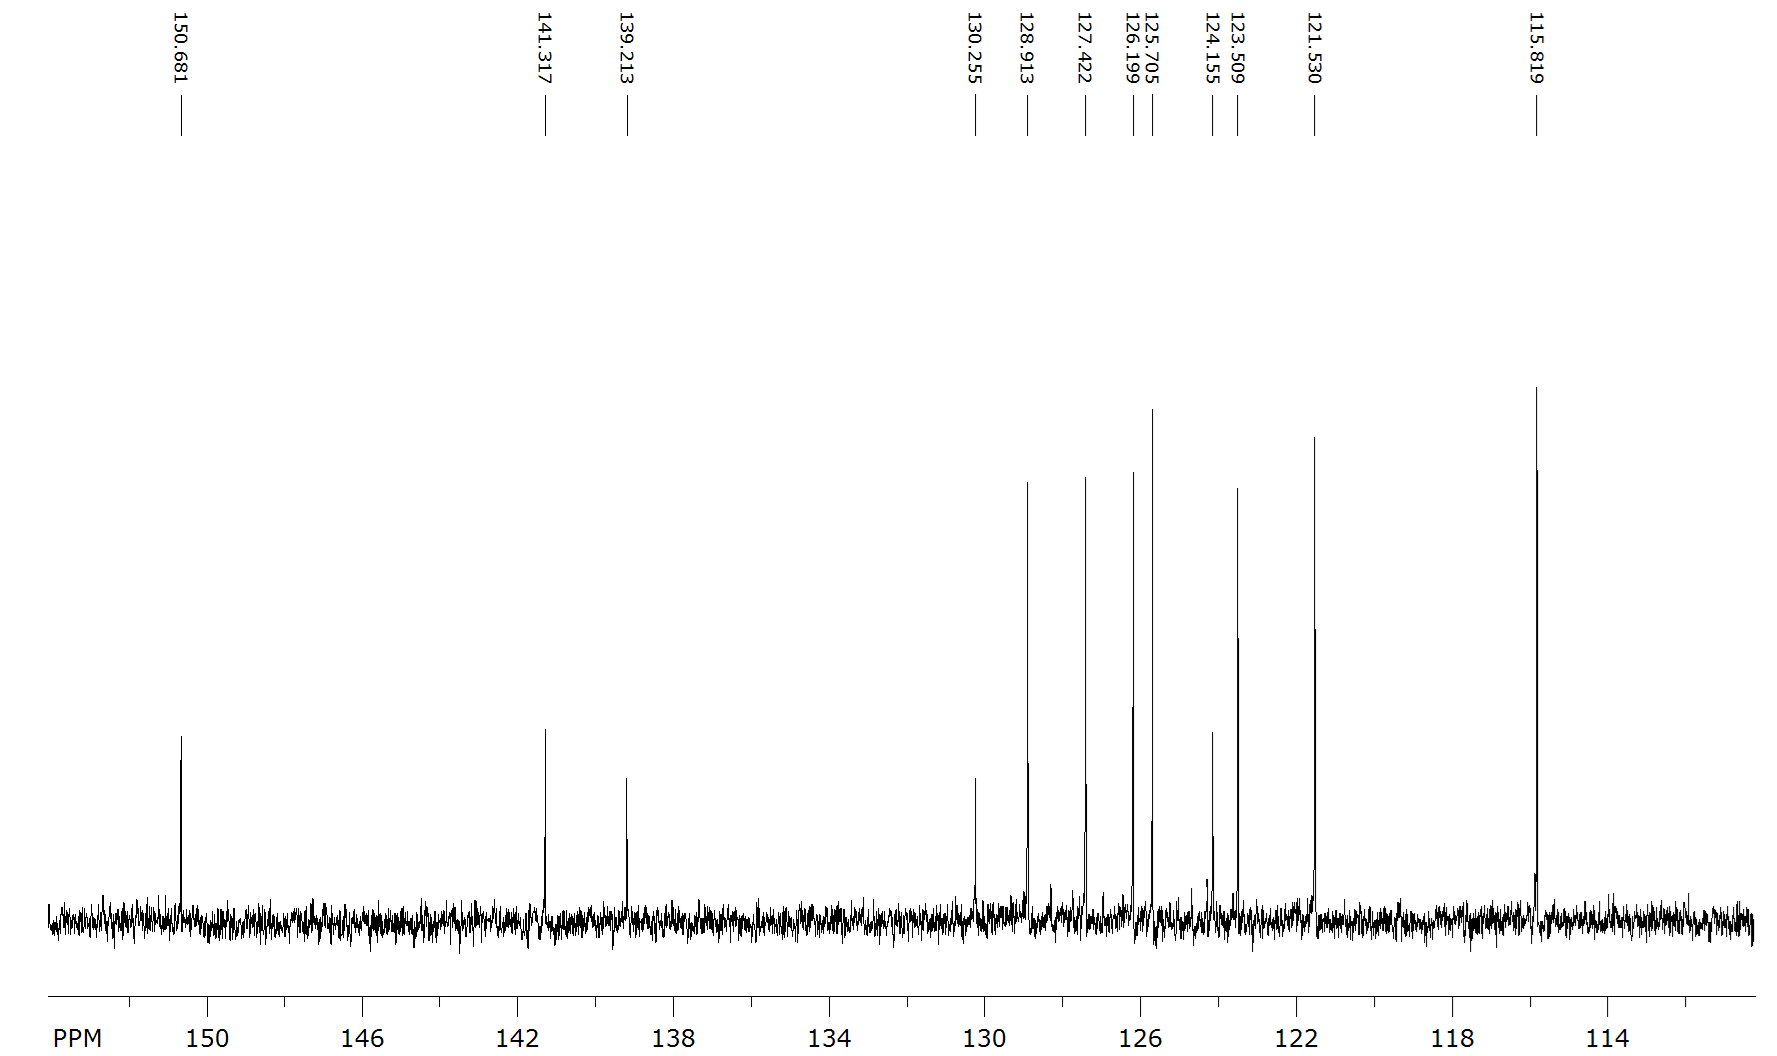


**Figure S39.** Aromatic part of 13C NMR (CDCl3) spectrum of **8**.

**Figure S40.** 1H NMR (CDCl3) spectrum of **9**.

**Figure S41.** Aromatic part of 1H NMR (CDCl3) spectrum of **9**.

**Figure S42.** 13C NMR (CDCl3) spectrum of **9**.


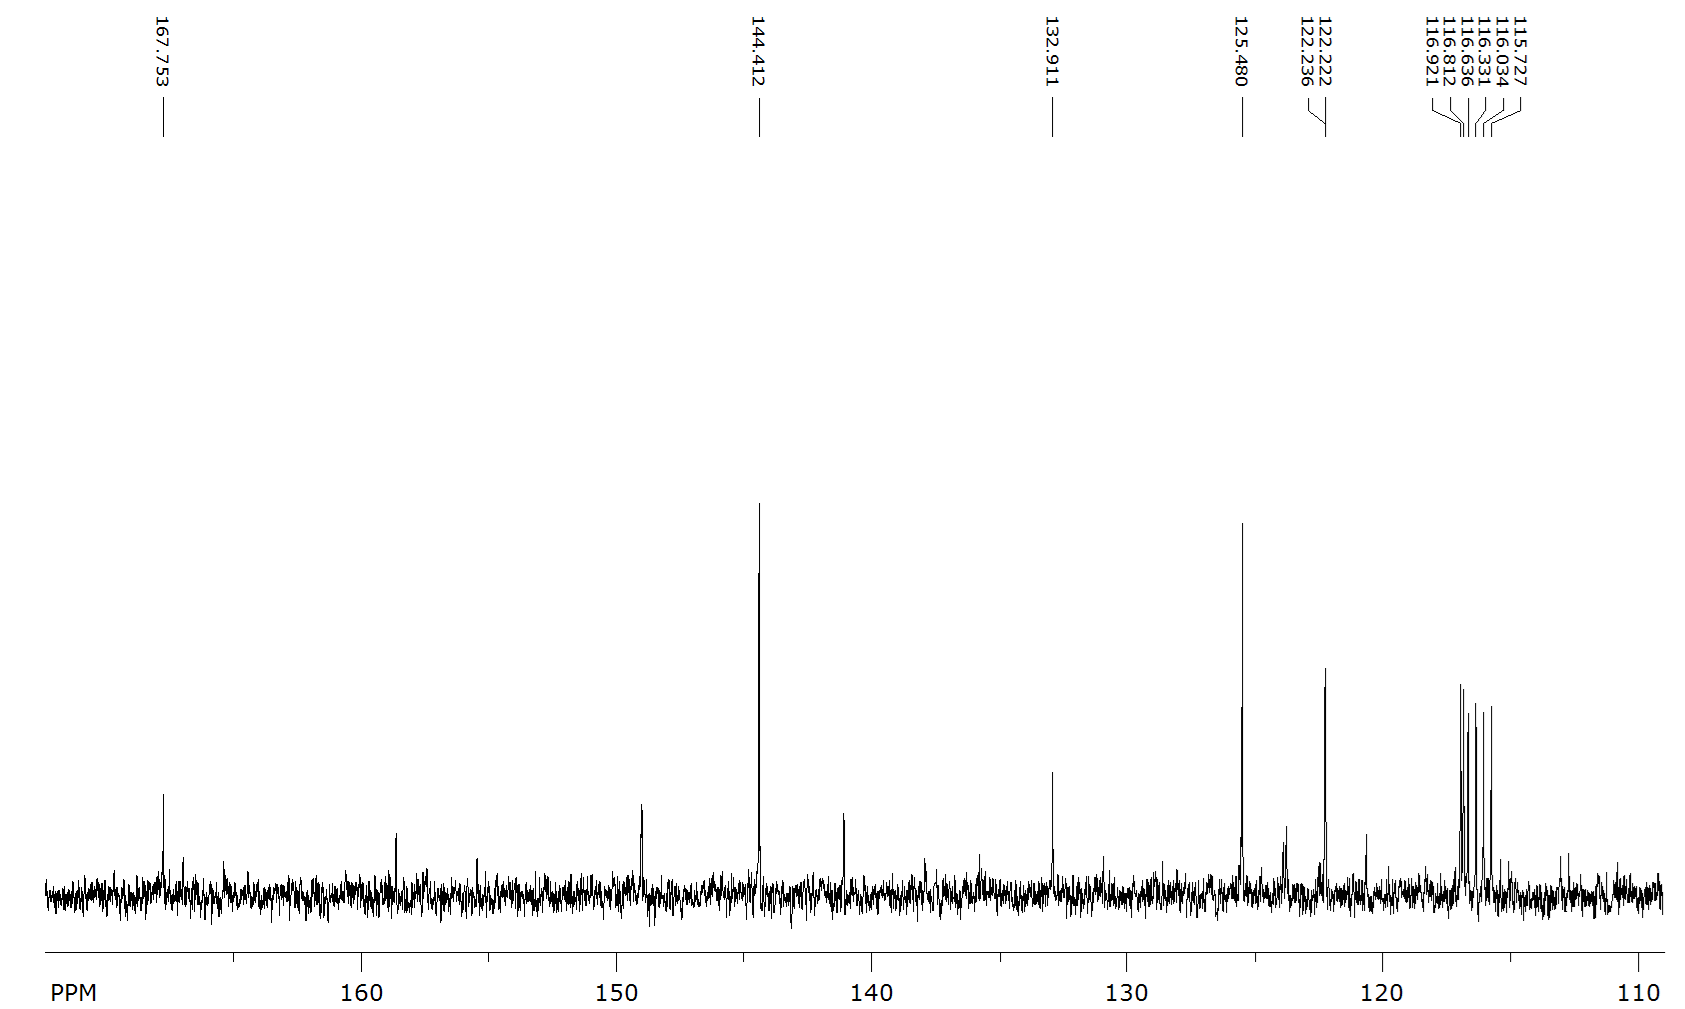


**Figure S43.** 13C NMR (CDCl3) aromatic part of spectrum of **9**.

**Figure S44.** 1H NMR (CDCl3) spectrum of **10**.


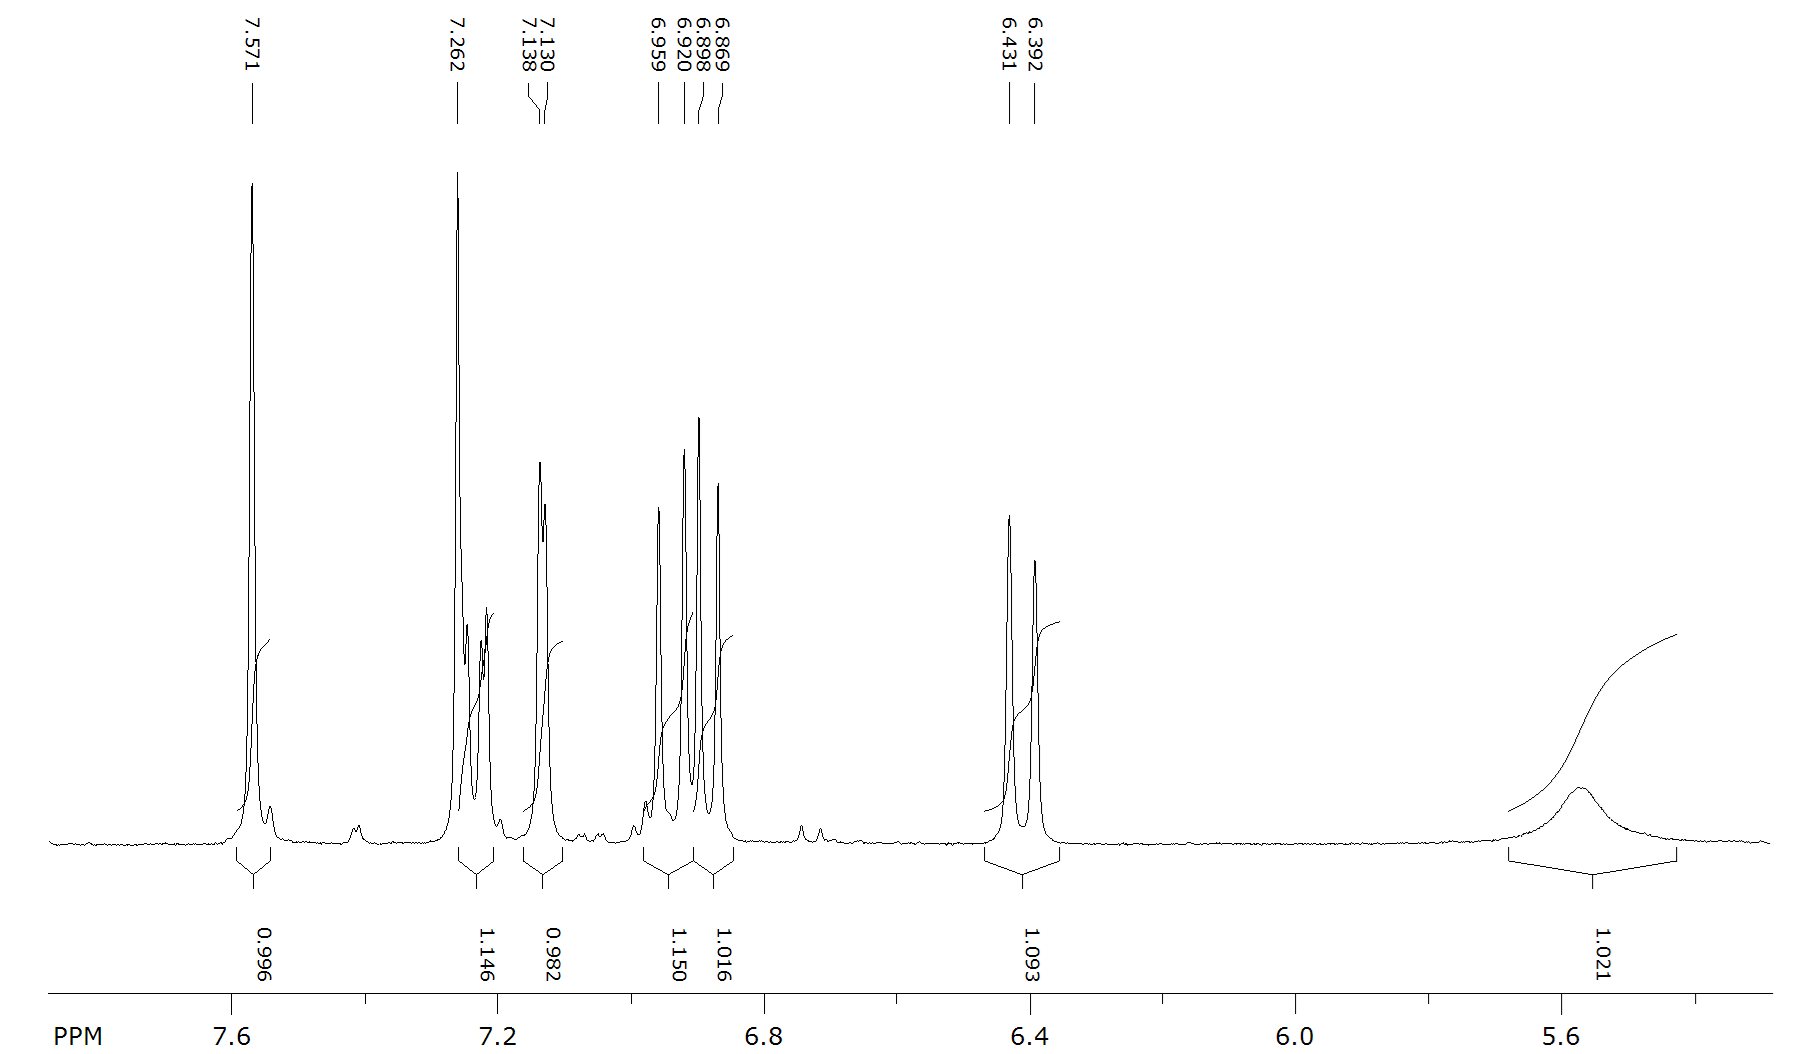


**Figure S45.** Aromatic part of 1H NMR (CDCl3) spectrum of **10**.


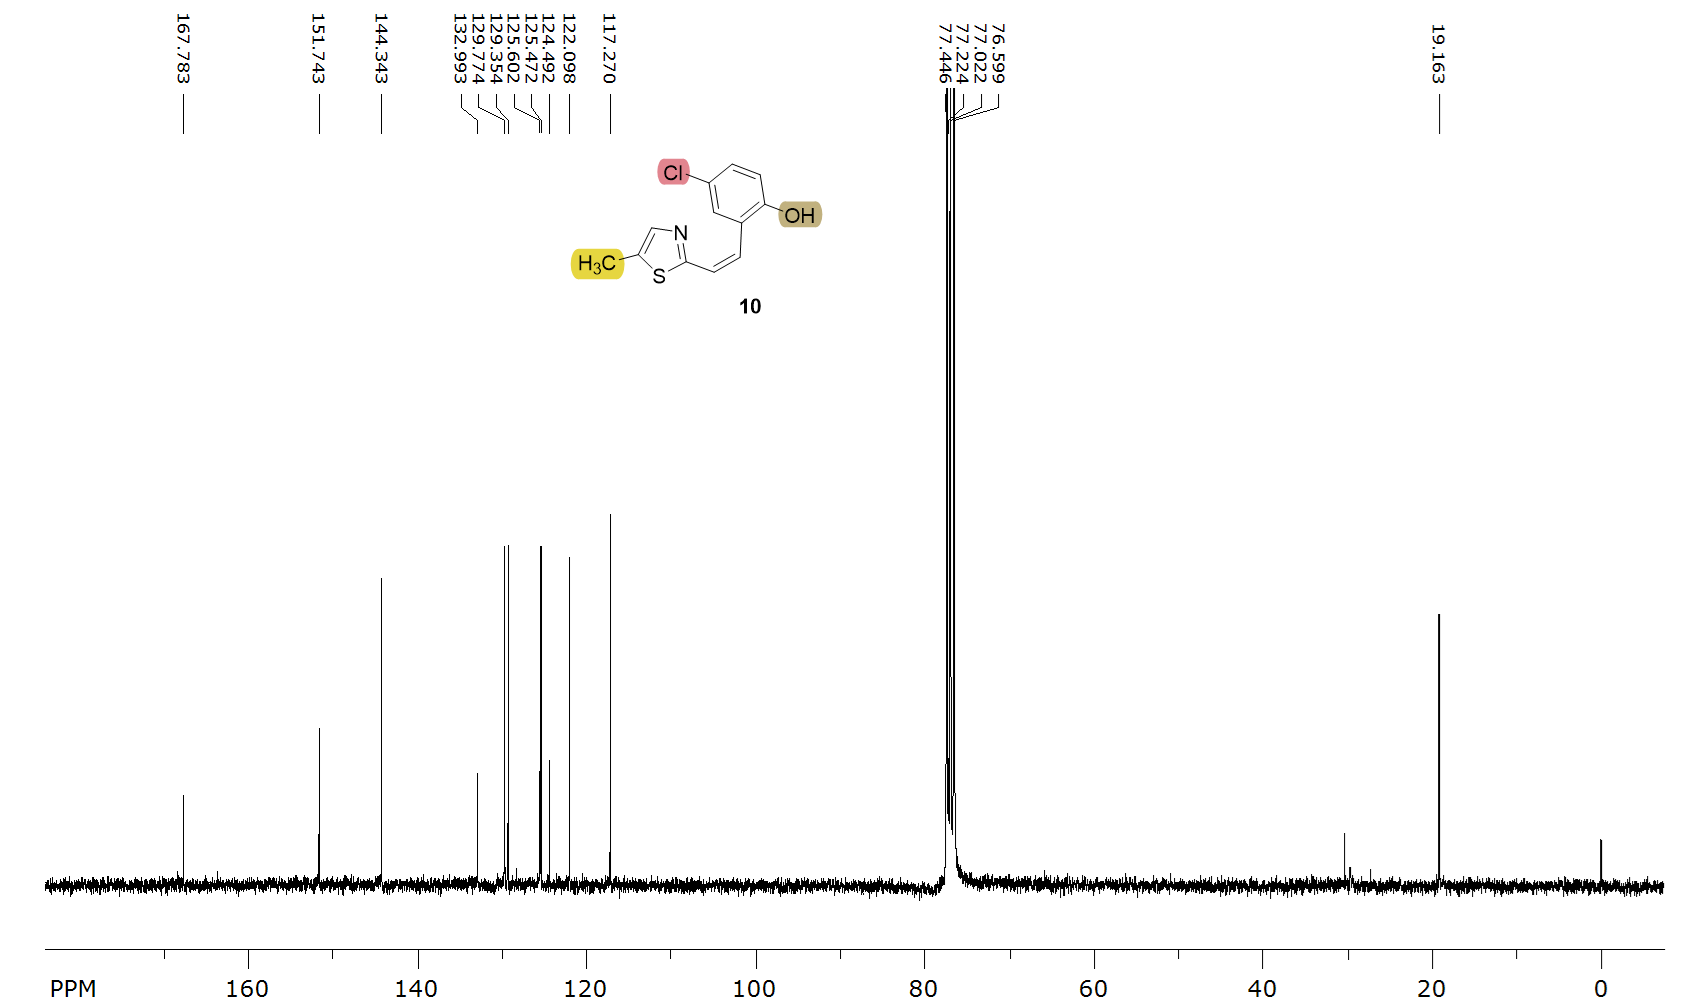


**Figure S46.** 13C NMR (CDCl3) spectrum of **10**.


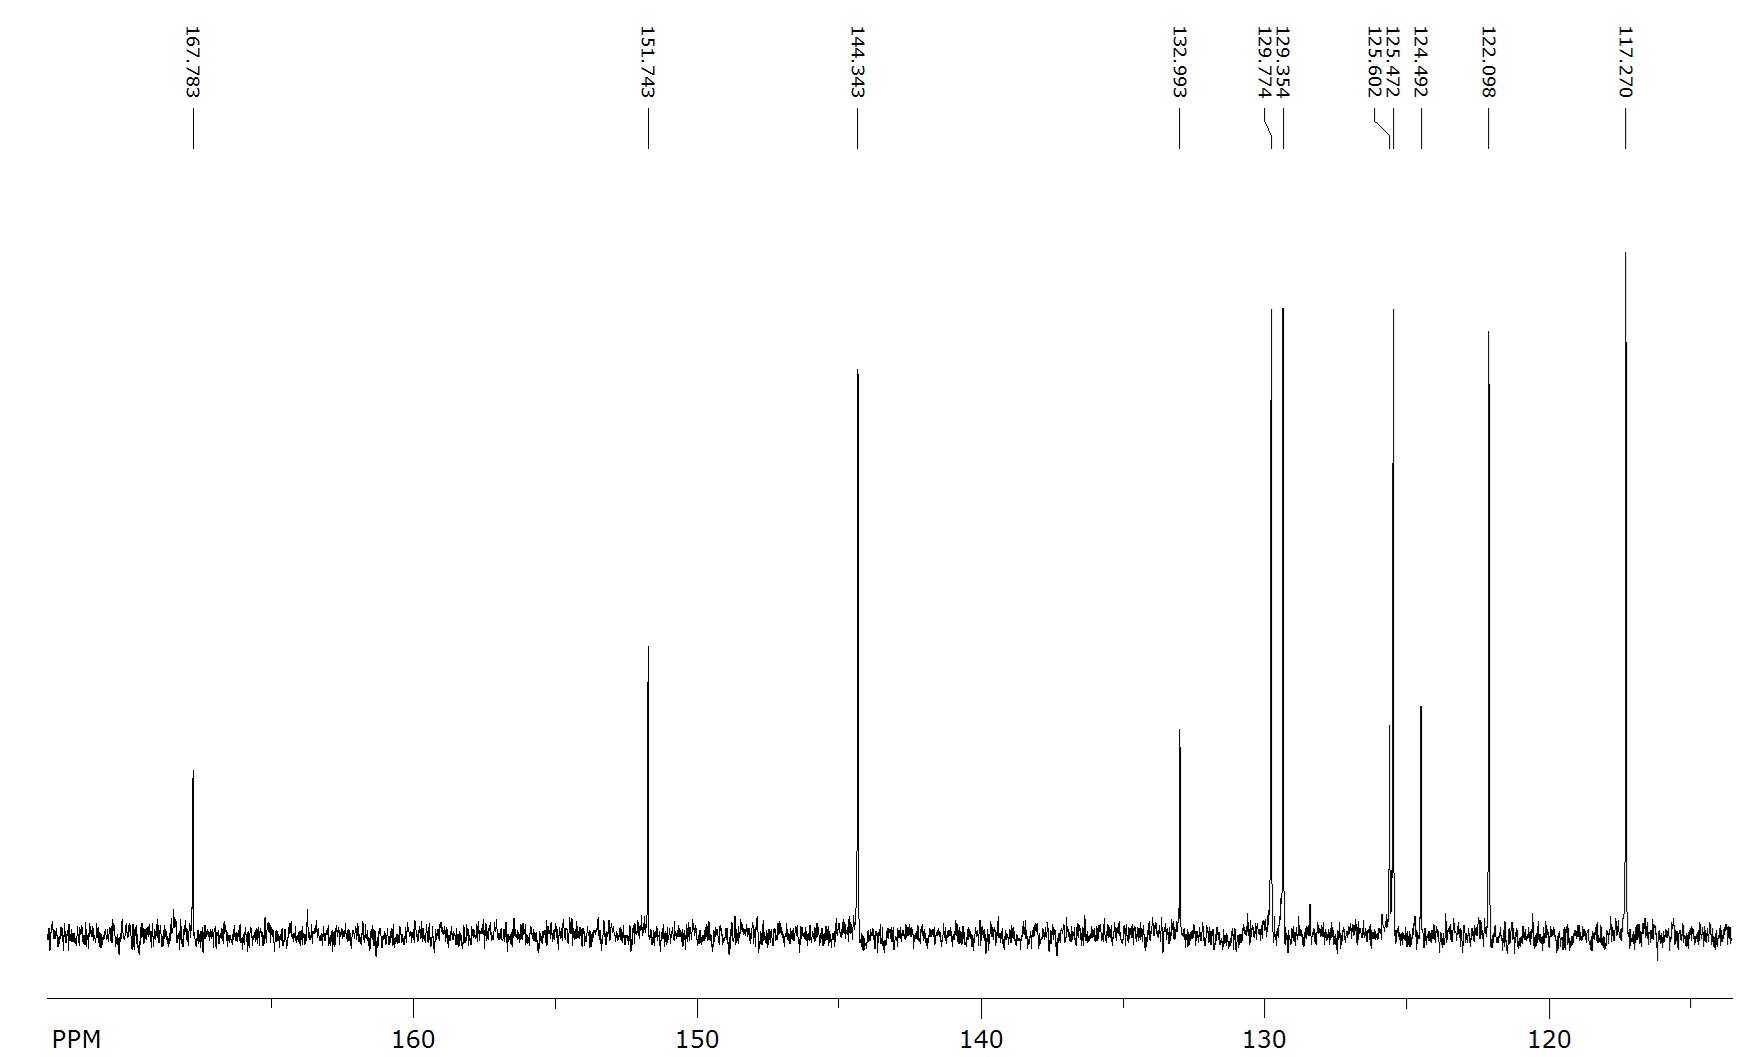


**Figure S47.** Aromatic part of 13C NMR (CDCl3) spectrum of **10**.


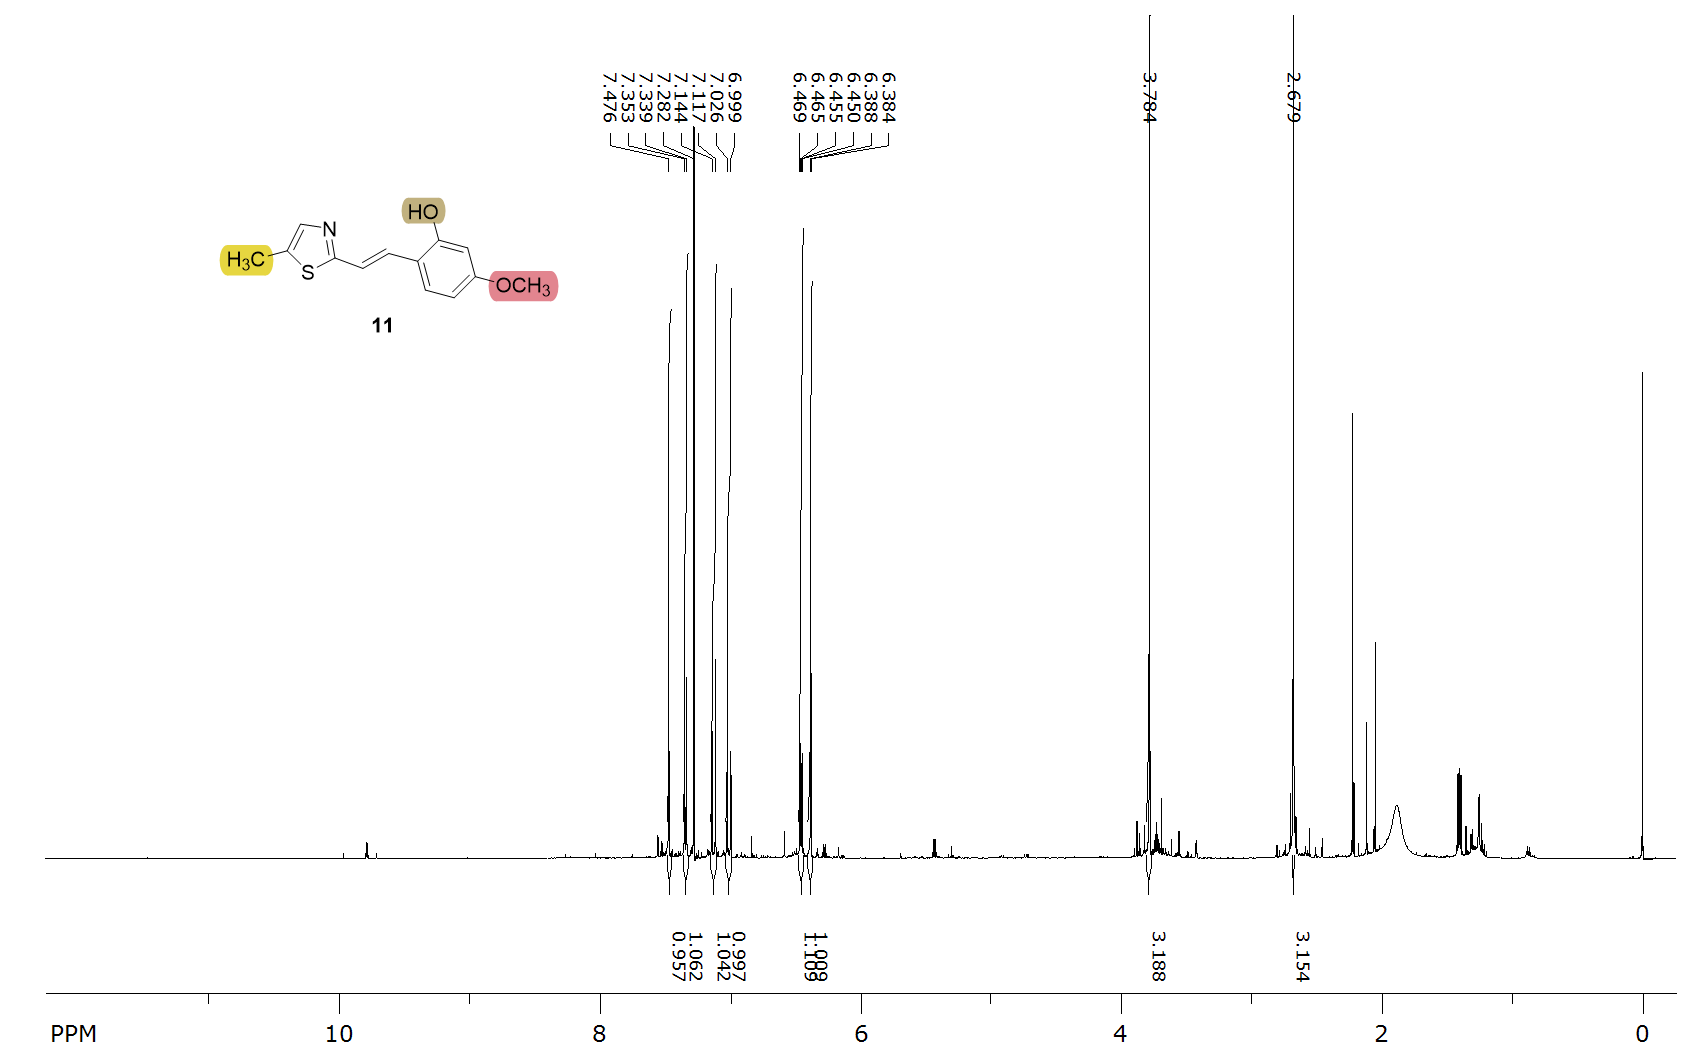


**Figure S48.** 1H NMR (CDCl3) spectrum of **11**.


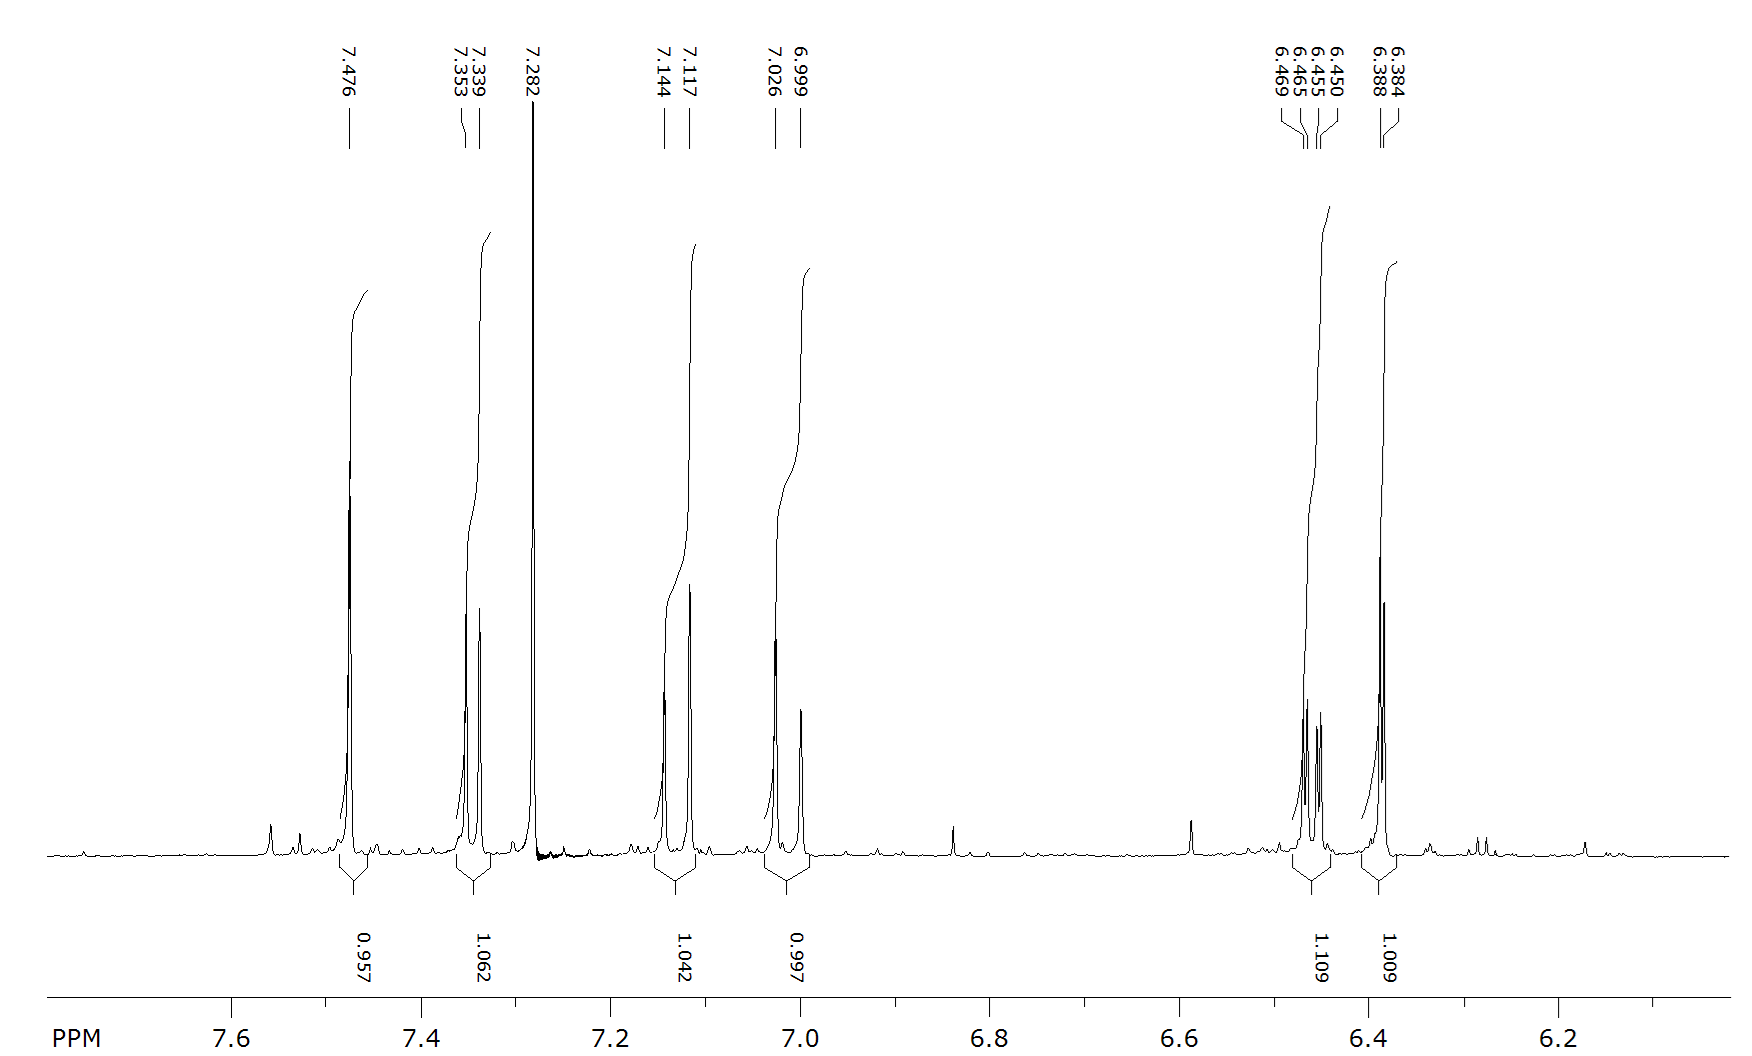


**Figure S49.** Aromatic part of 1H NMR (CDCl3) spectrum of **11**.


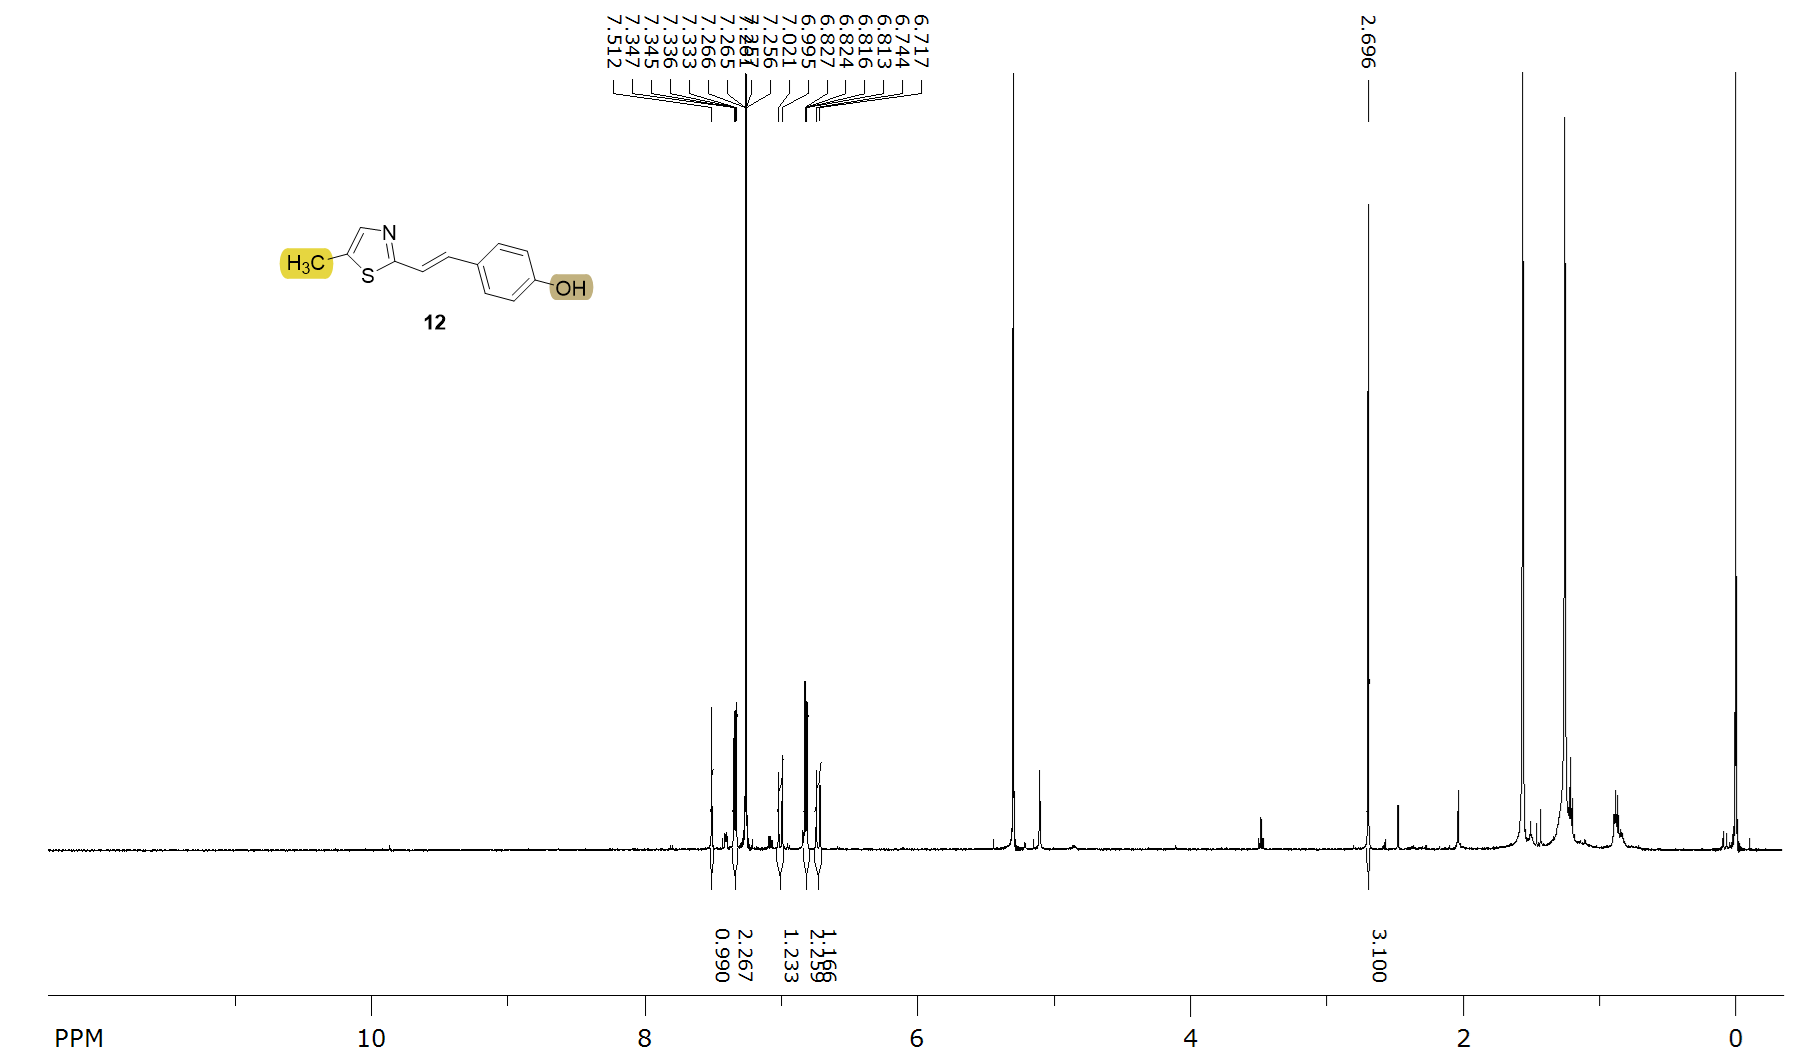


**Figure S50.** 1H NMR (CDCl3) spectrum of **12**.


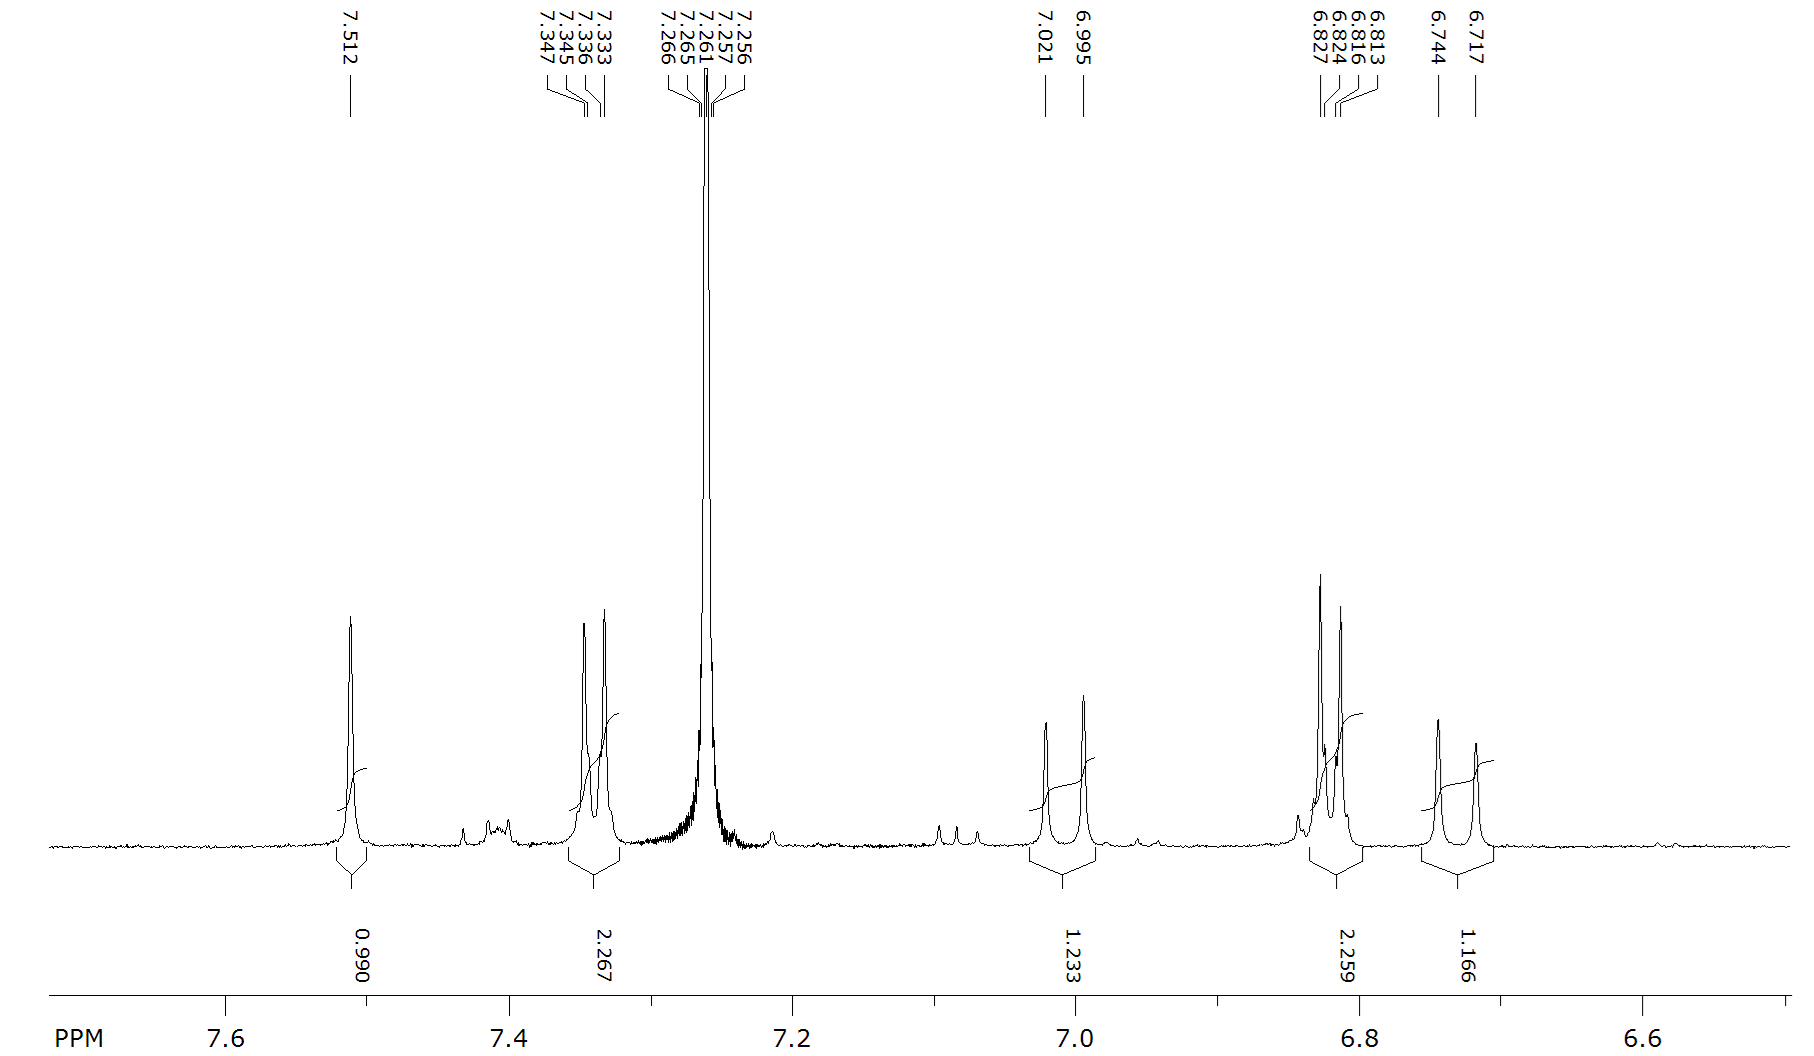


**Figure S51.** Aromatic part of 1H NMR (CDCl3) spectrum of **12**.


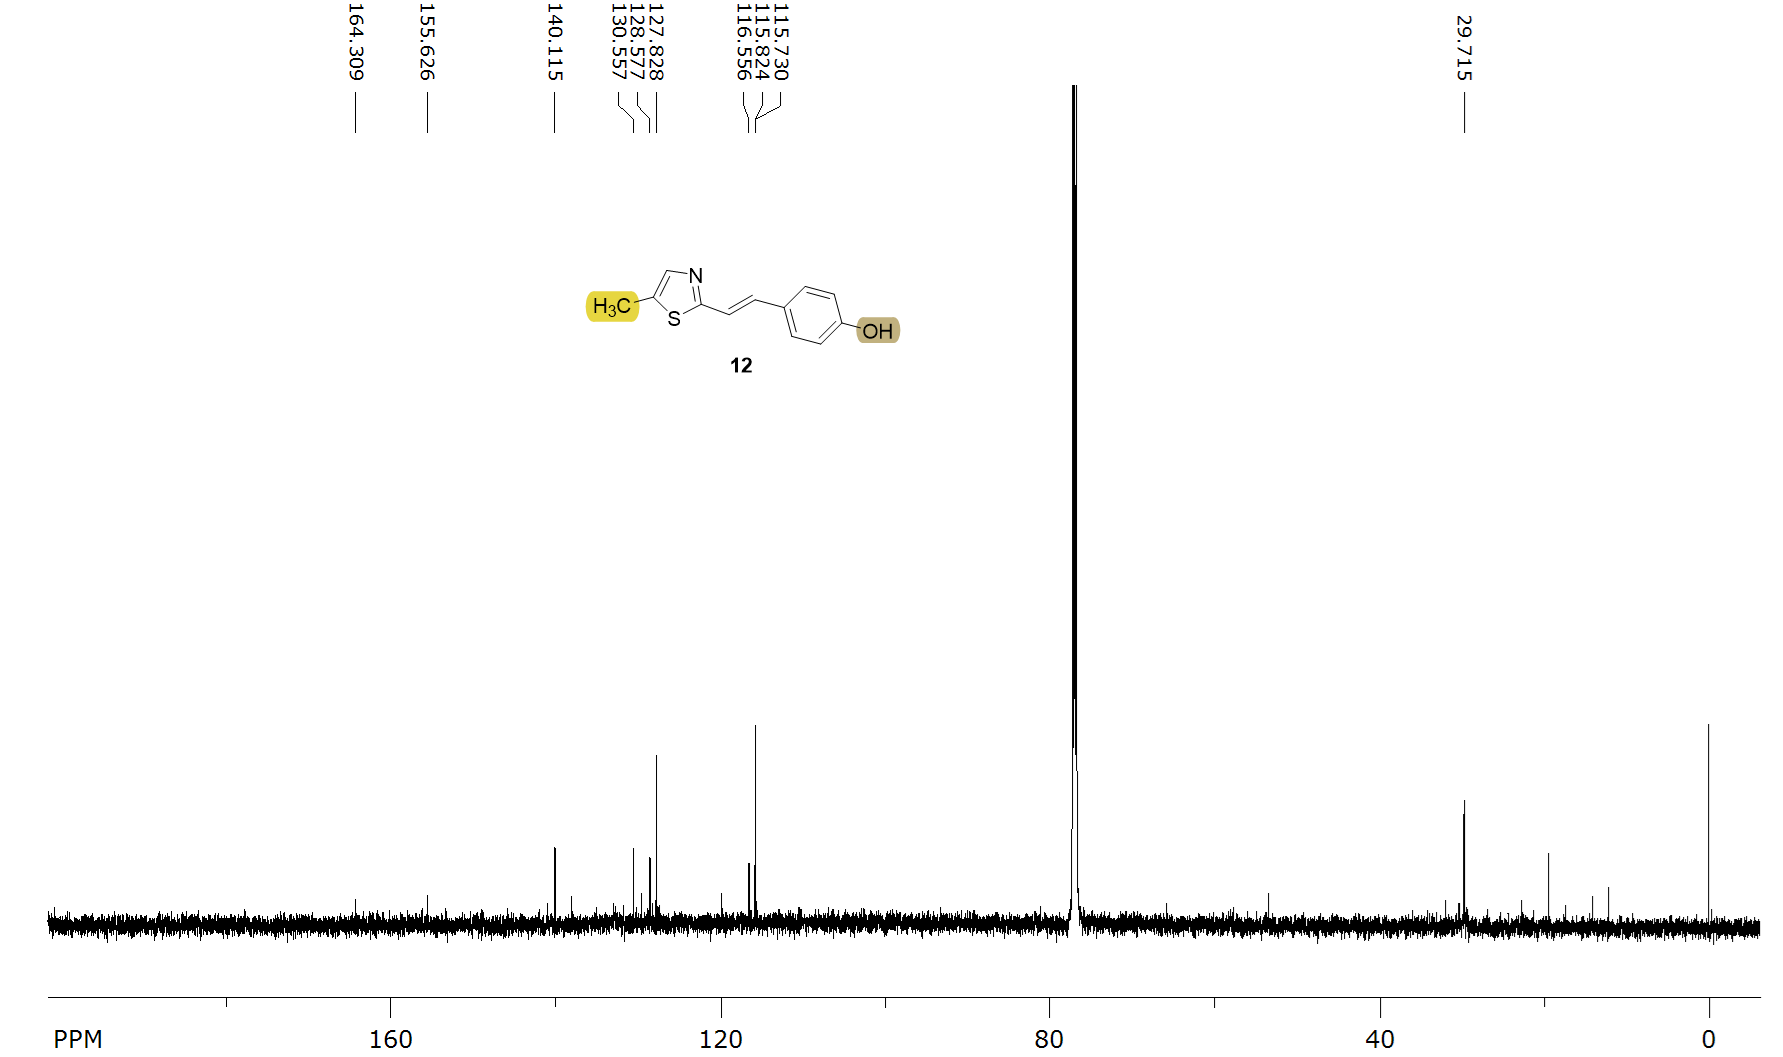


**Figure S52.** 13C NMR (CDCl3) spectrum of **12**.


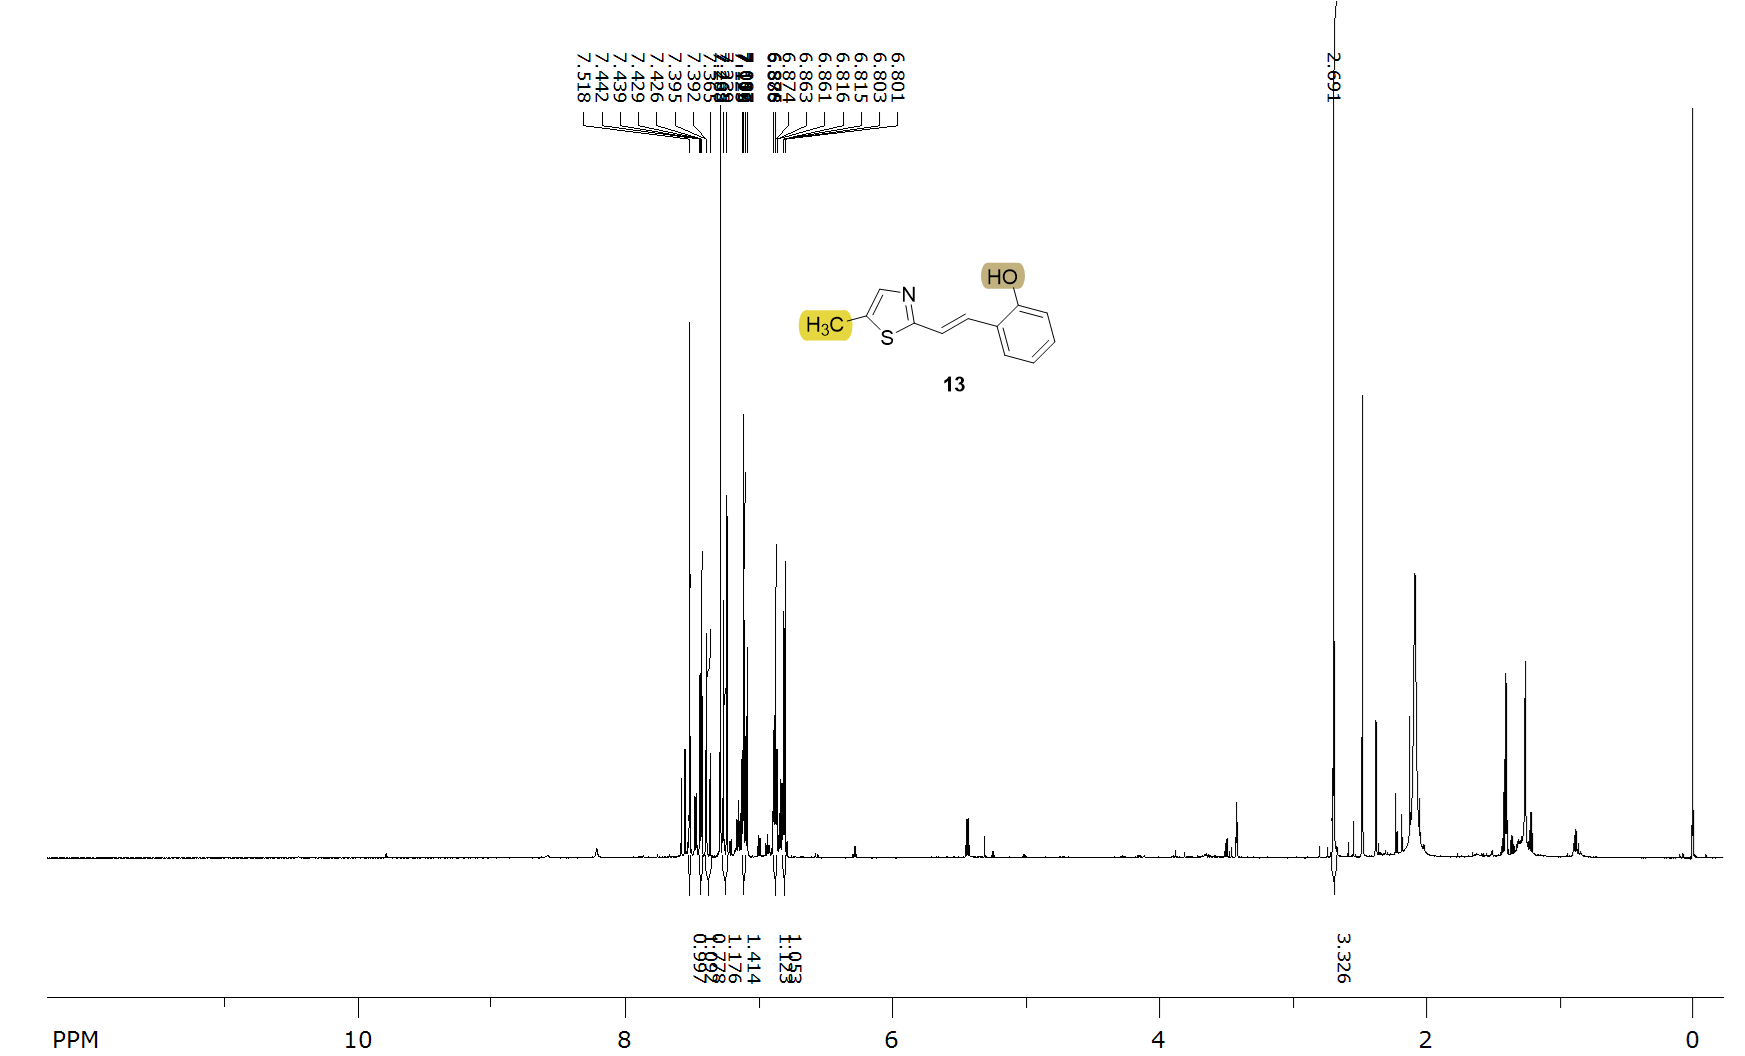


**Figure S53.** 1H NMR (CDCl3) spectrum of **13**.


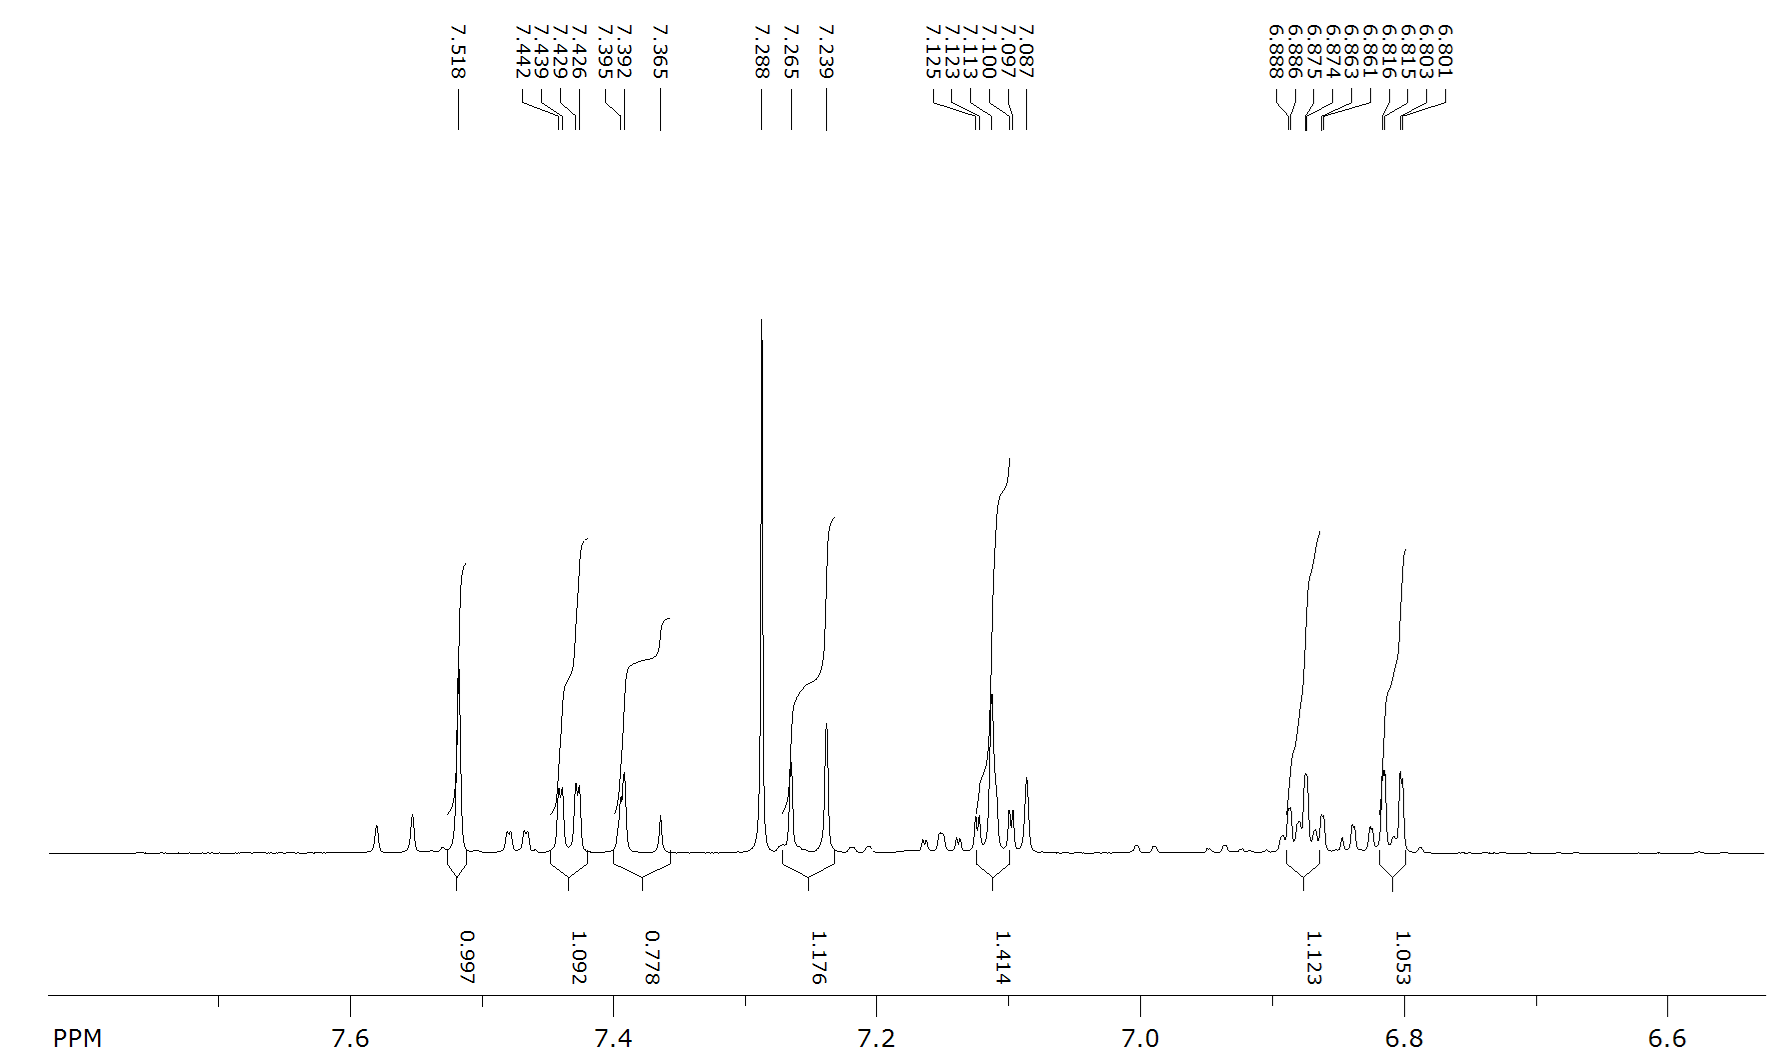


**Figure S54.** Aromatic part of 1H NMR (CDCl3) spectrum of **13** (with a small amount of *cis*-isomer).


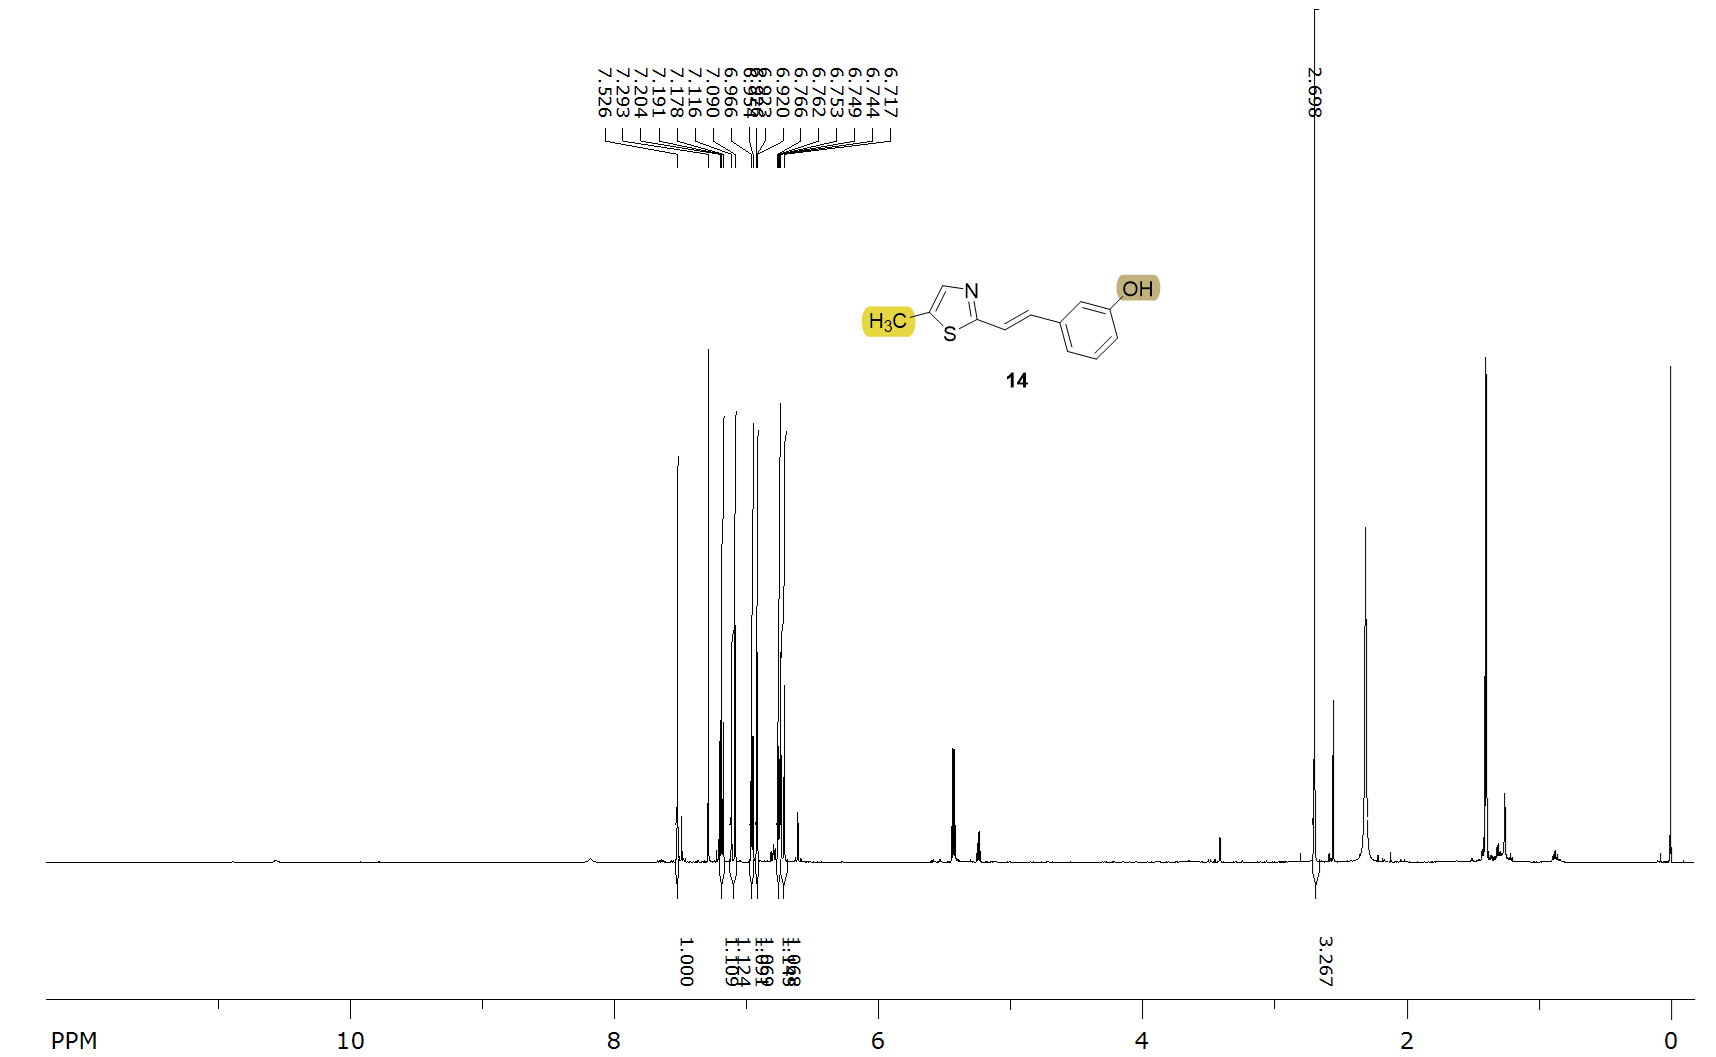


**Figure S55.** 1H NMR (CDCl3) spectrum of **14**.


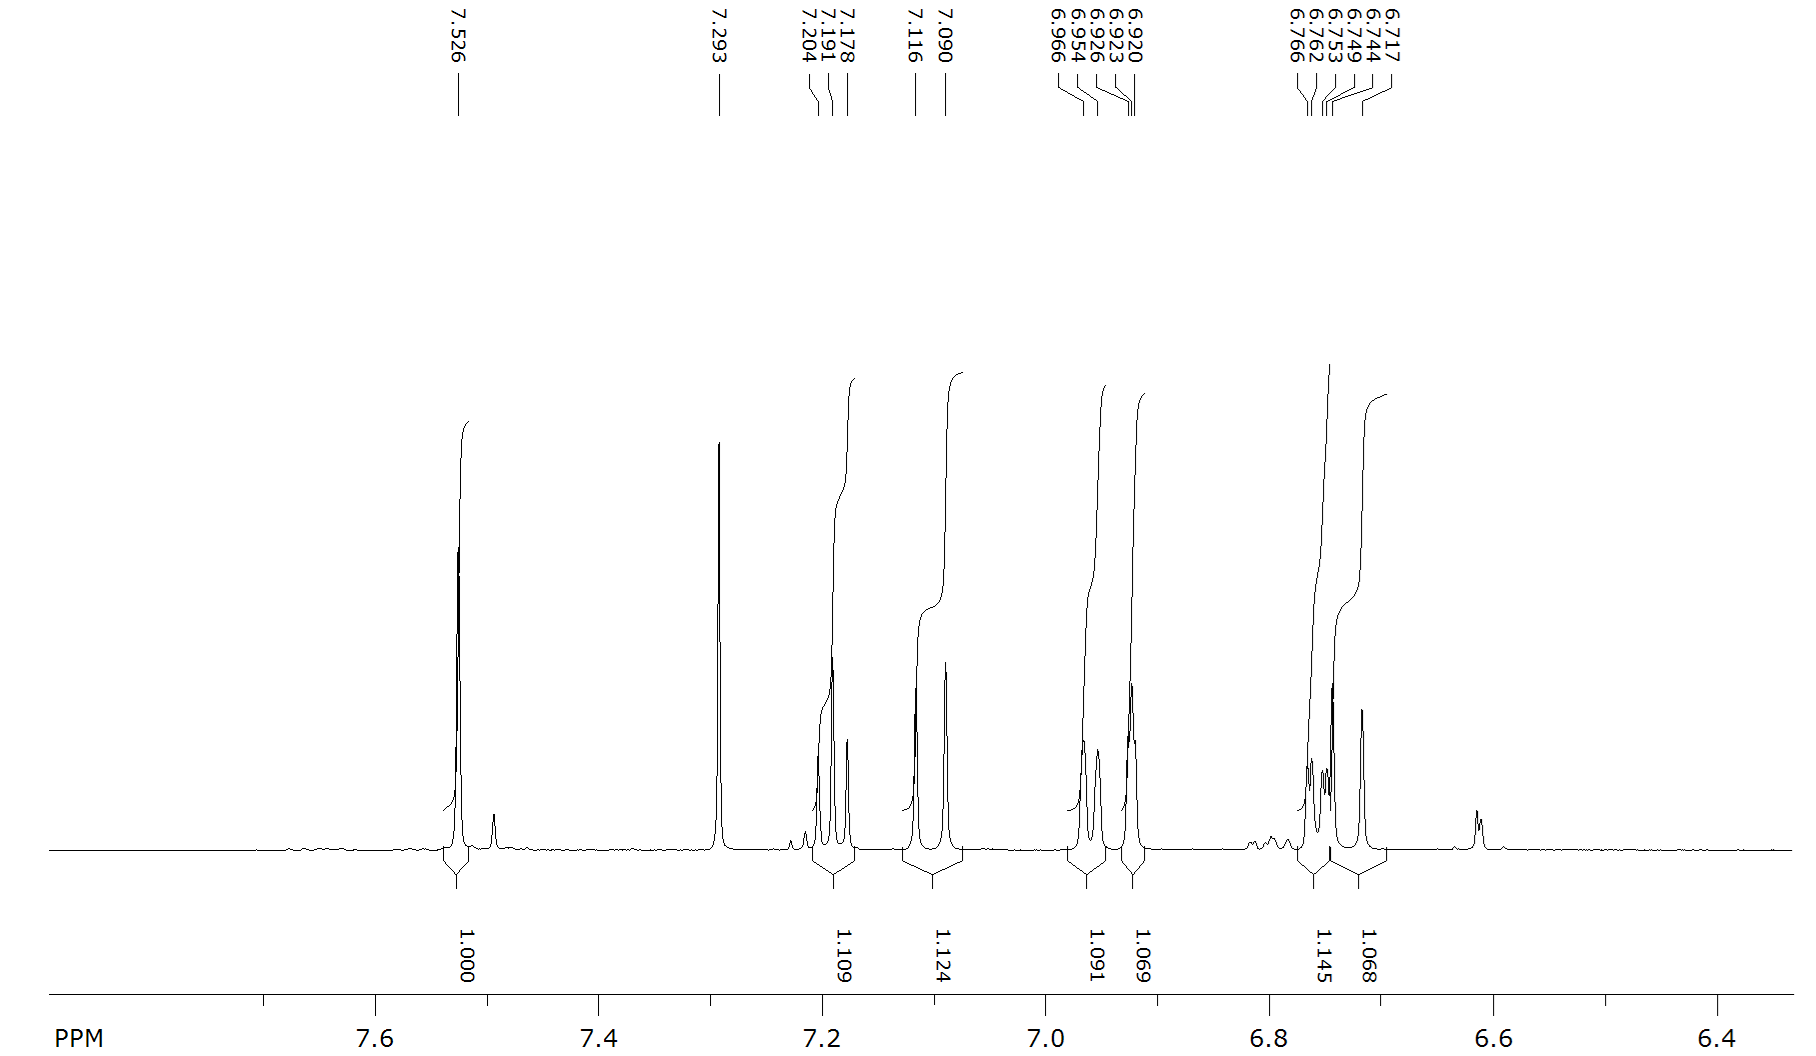


**Figure S56.**Aromatic part of 1H NMR (CDCl3) spectrum of **14**.


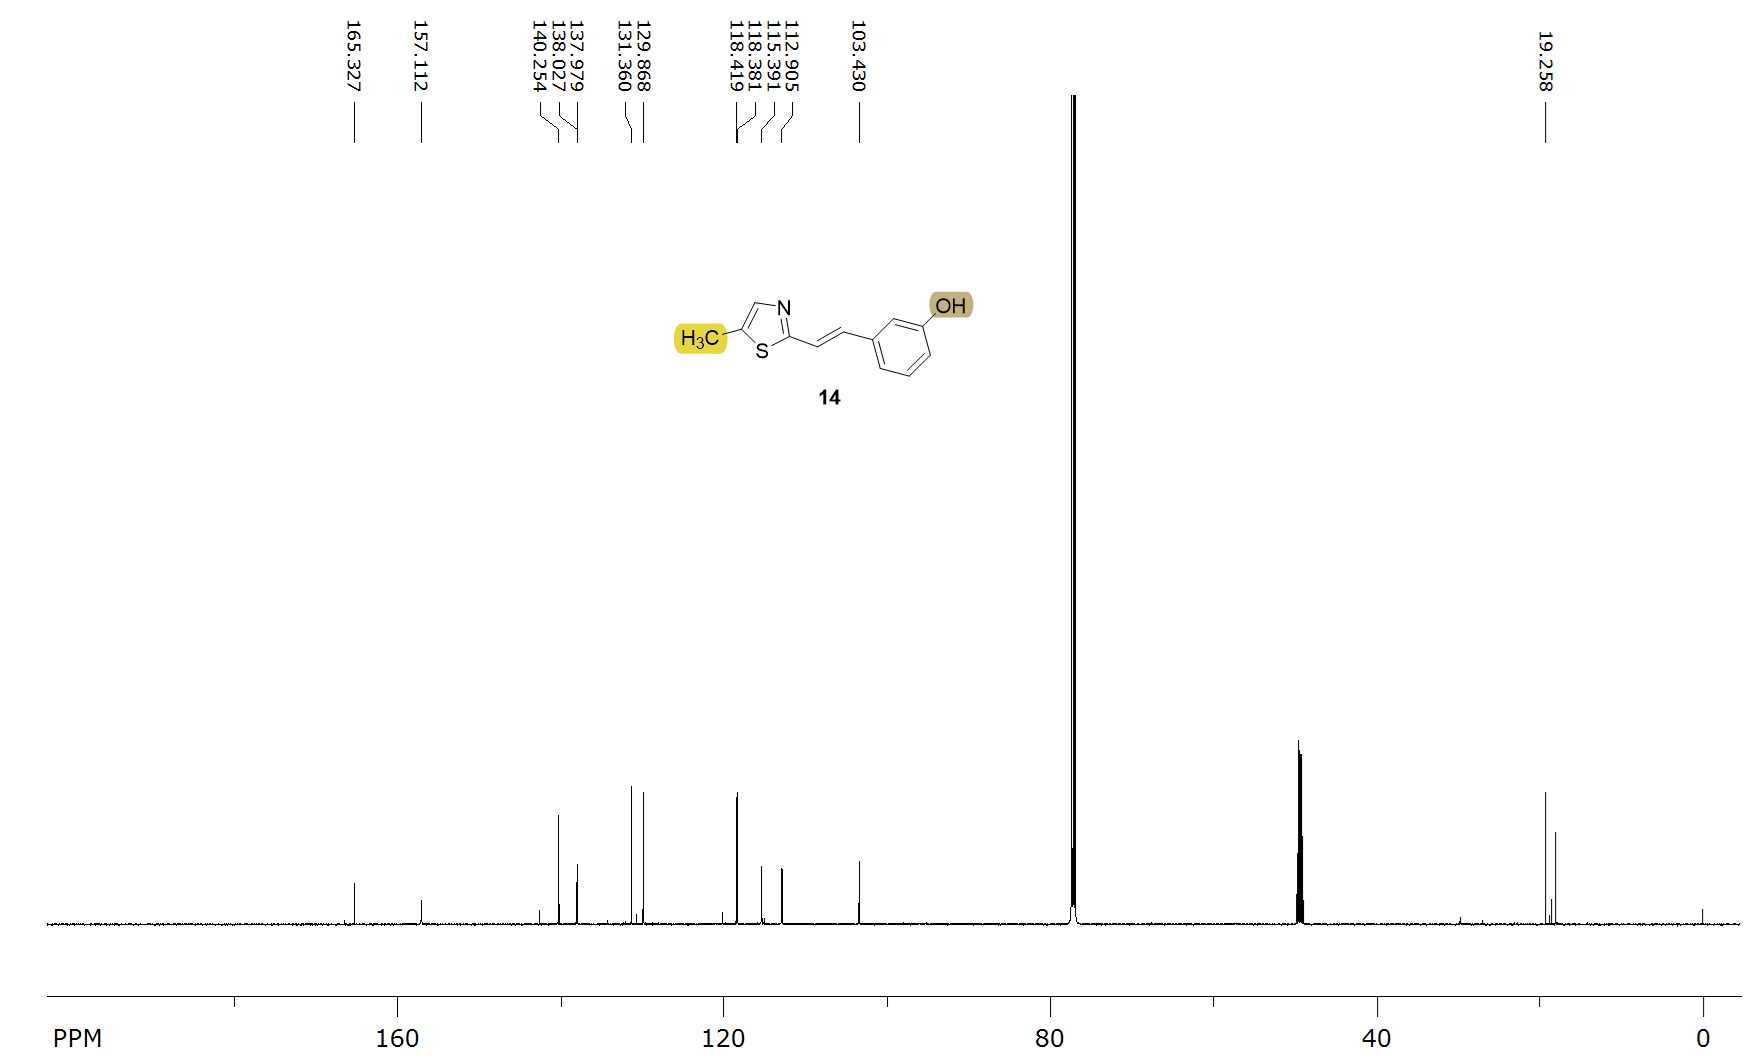


**Figure S57.** 13C NMR (CDCl3) spectrum of **14**.

1. Mass spektra and HRMS analyses of compounds **1**–**14**


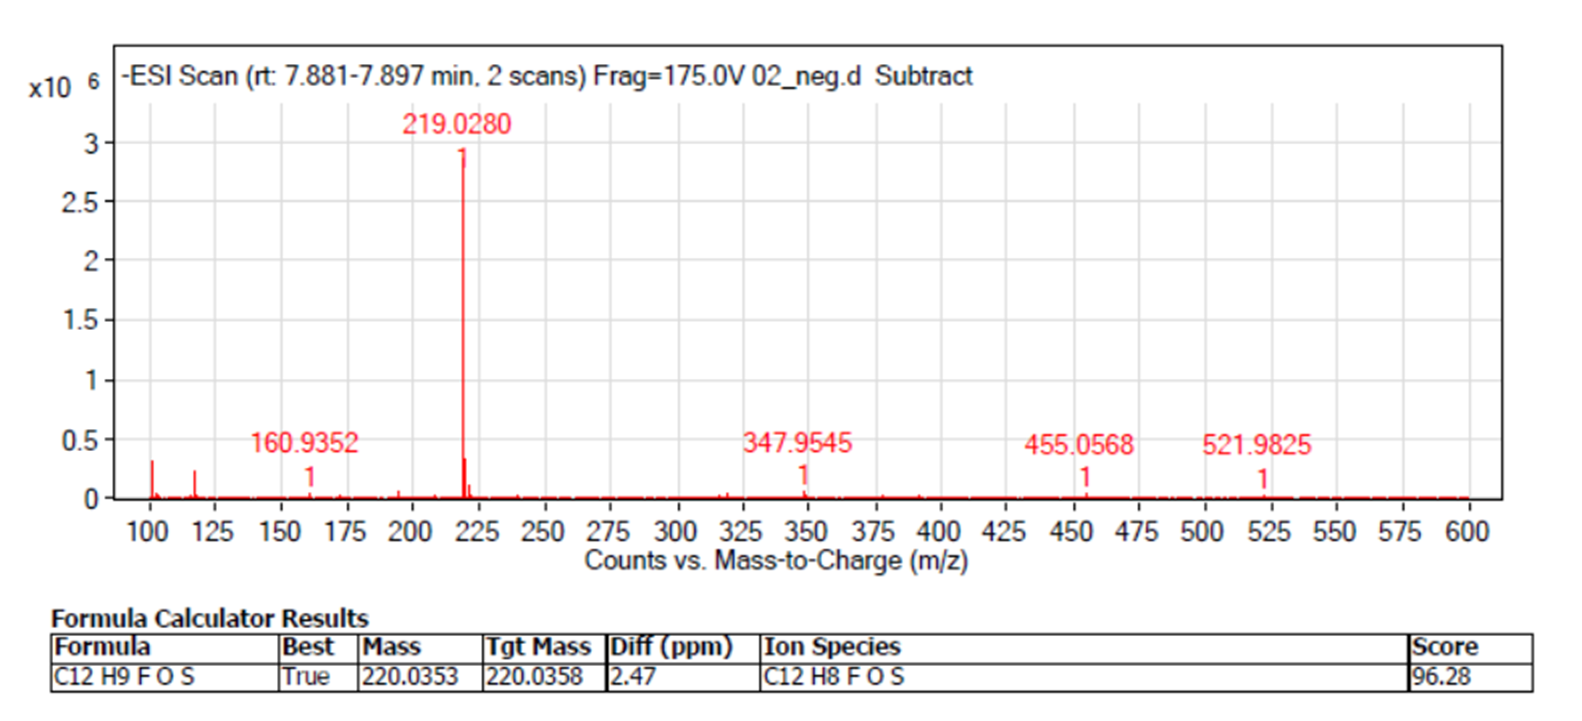


**Figure S58.** Mass spectrum and HRMS analysis of compound **1**.


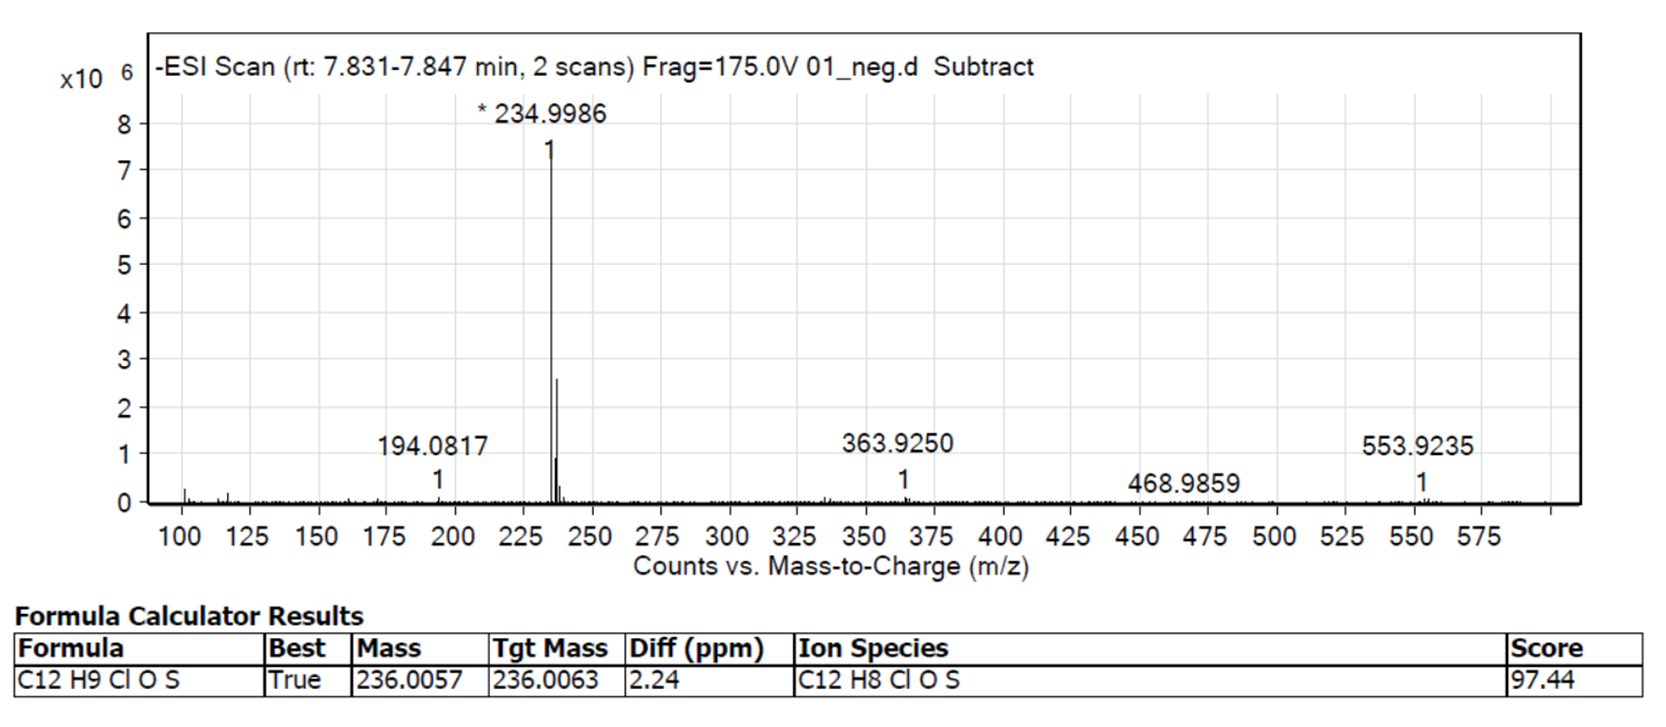


**Figure S59.** Mass spectrum and HRMS analysis of compound **2**.


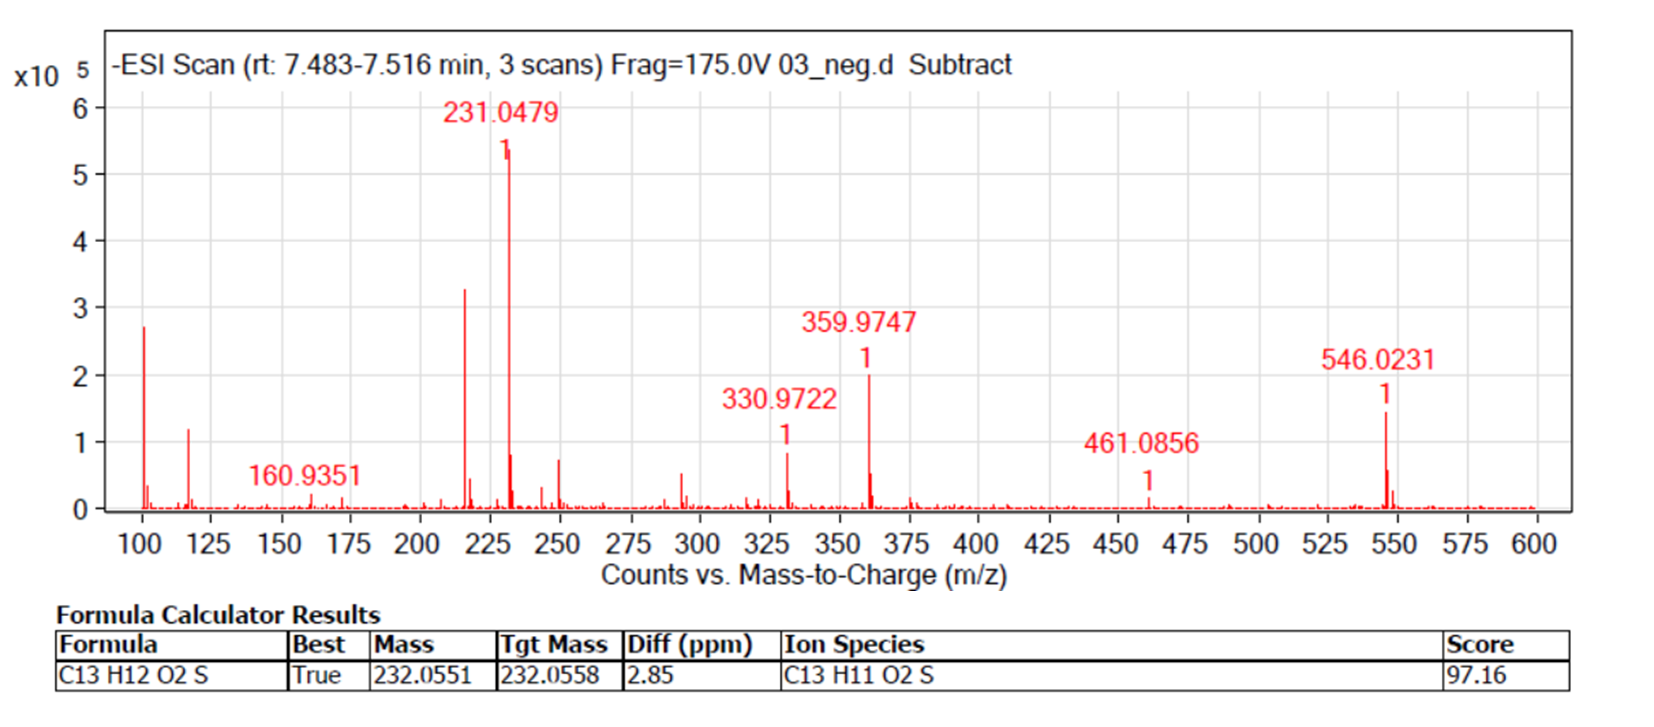


**Figure S60.** Mass spectrum and HRMS analysis of compound **3**.


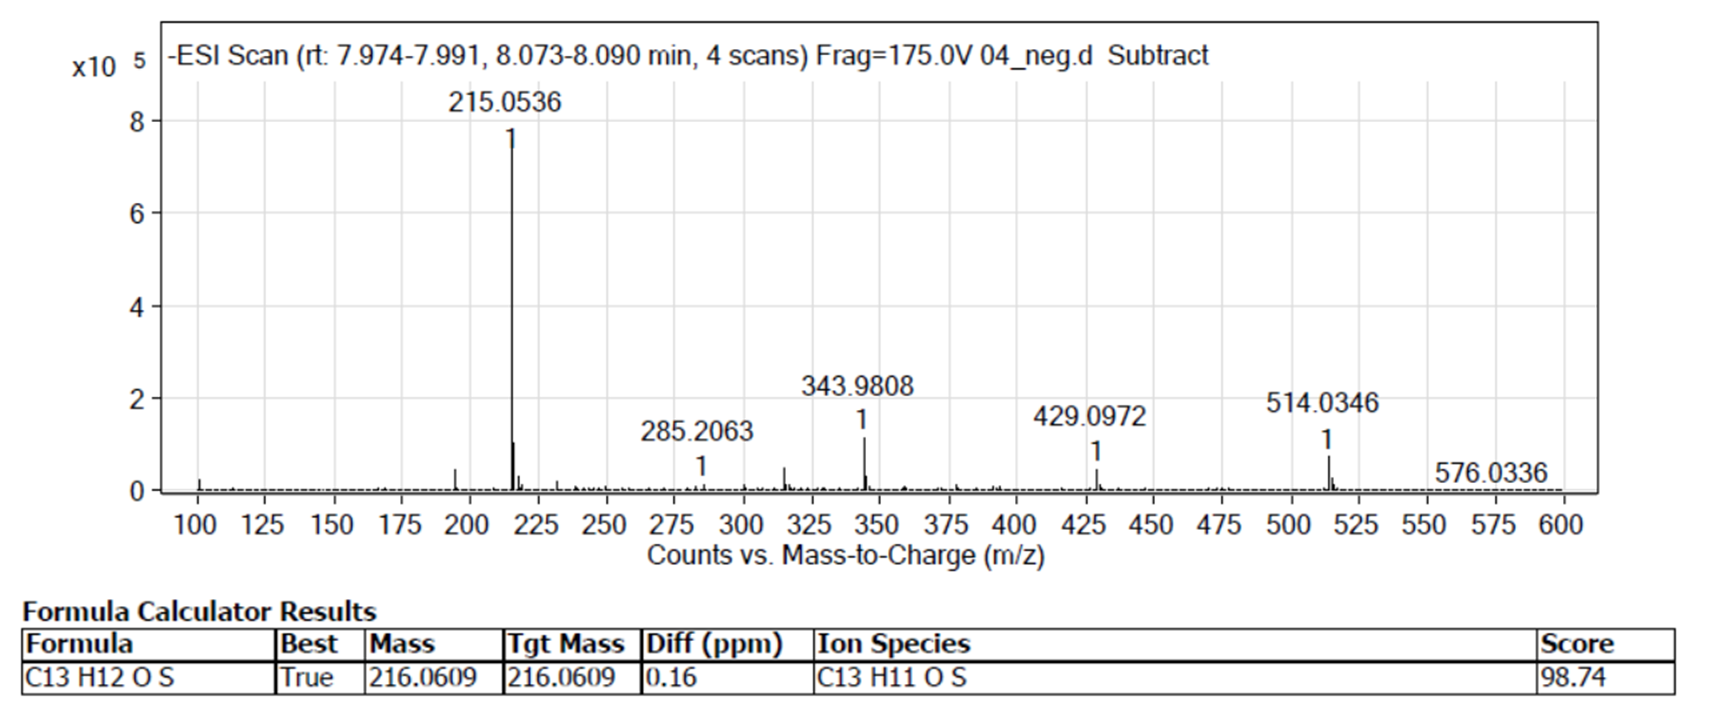


**Figure S61.** Mass spectrum and HRMS analysis of compound **4**.


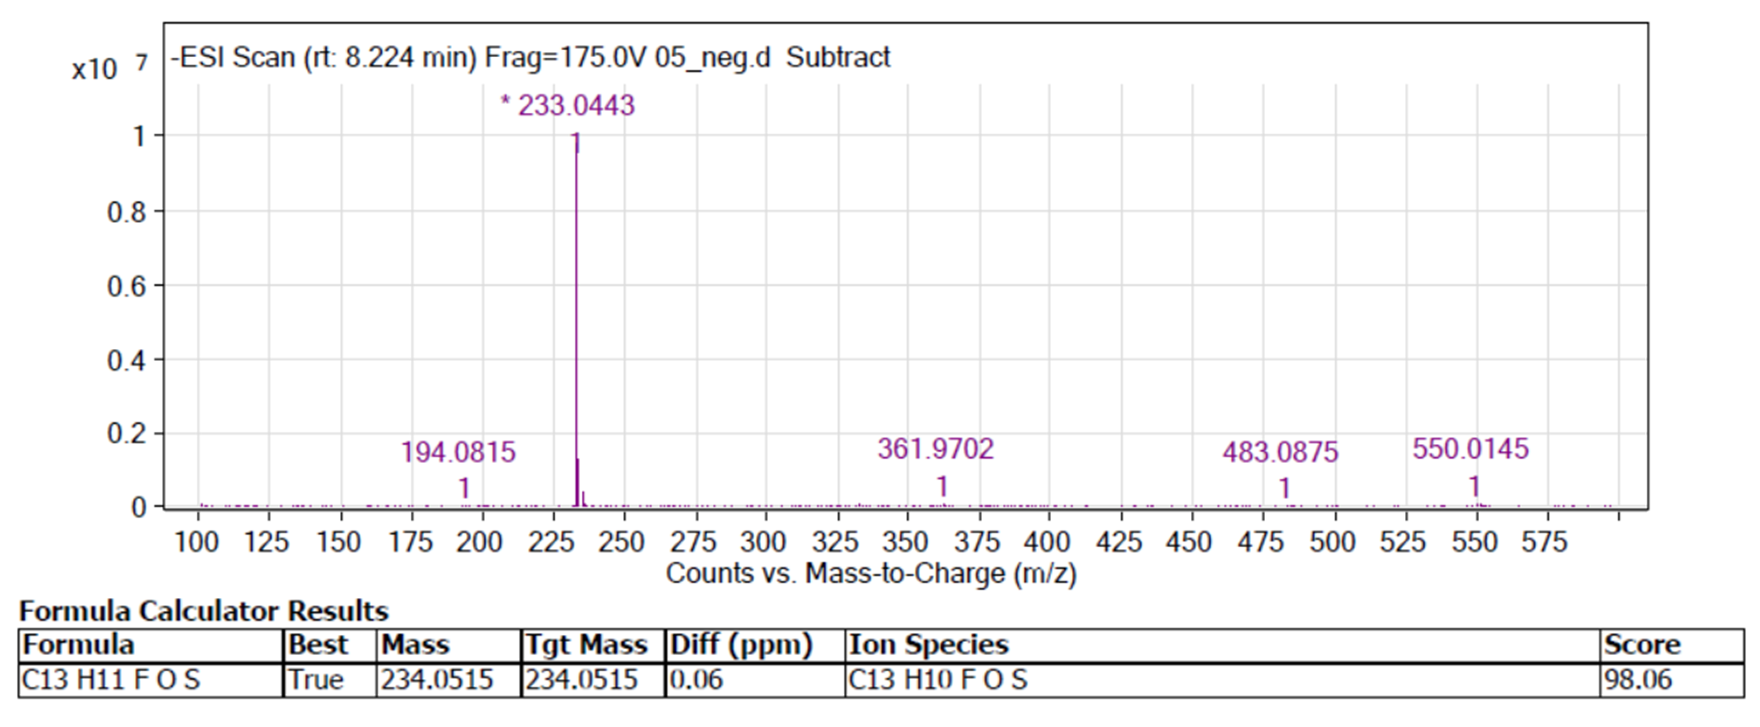


**Figure S62.** Mass spectrum and HRMS analysis of compound **5**.


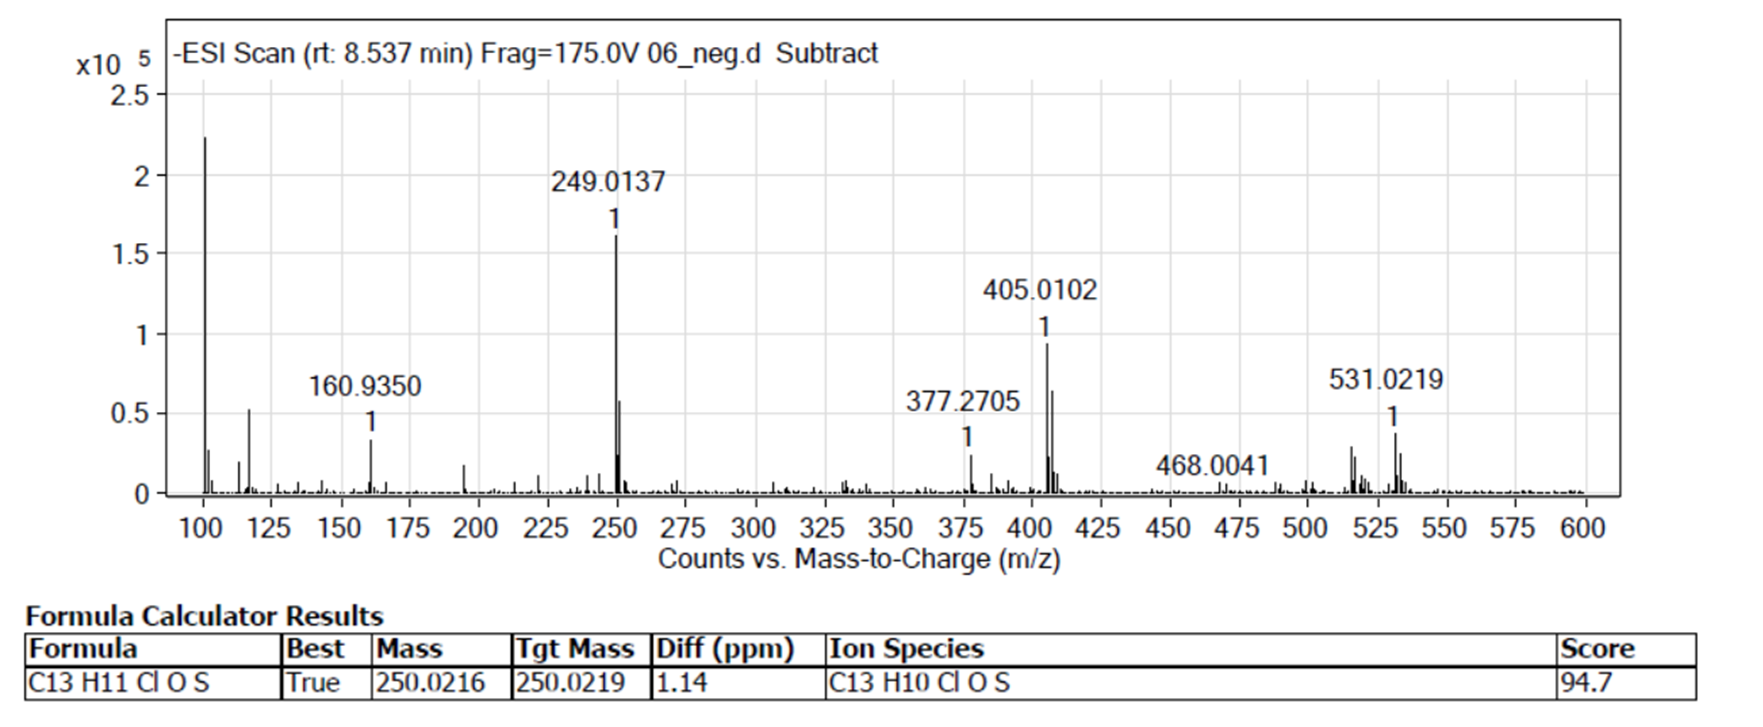


**Figure S63.** Mass spectrum and HRMS analysis of compound **6**.


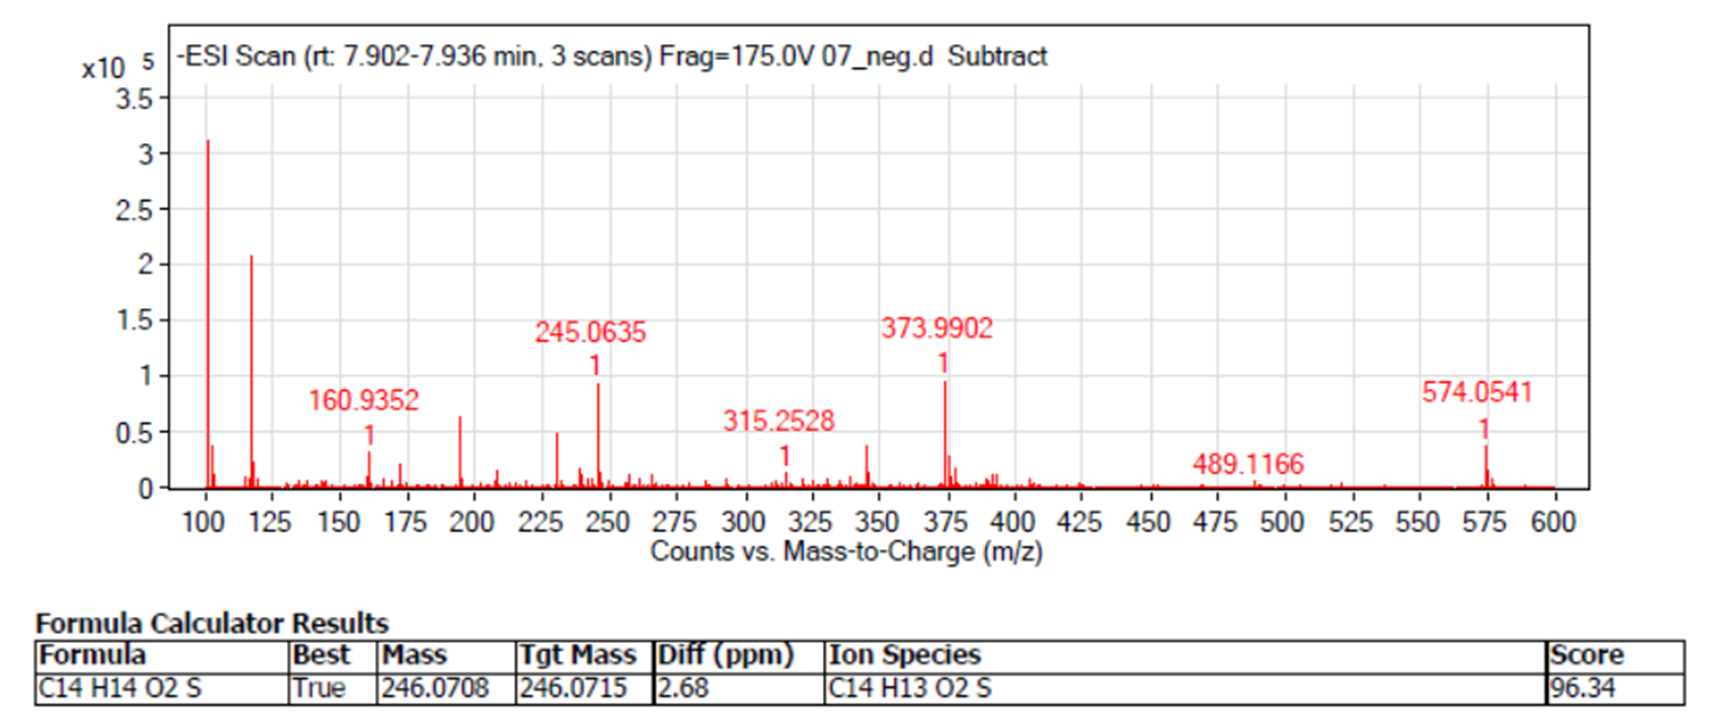


**Figure S64.** Mass spectrum and HRMS analysis of compound **7**.


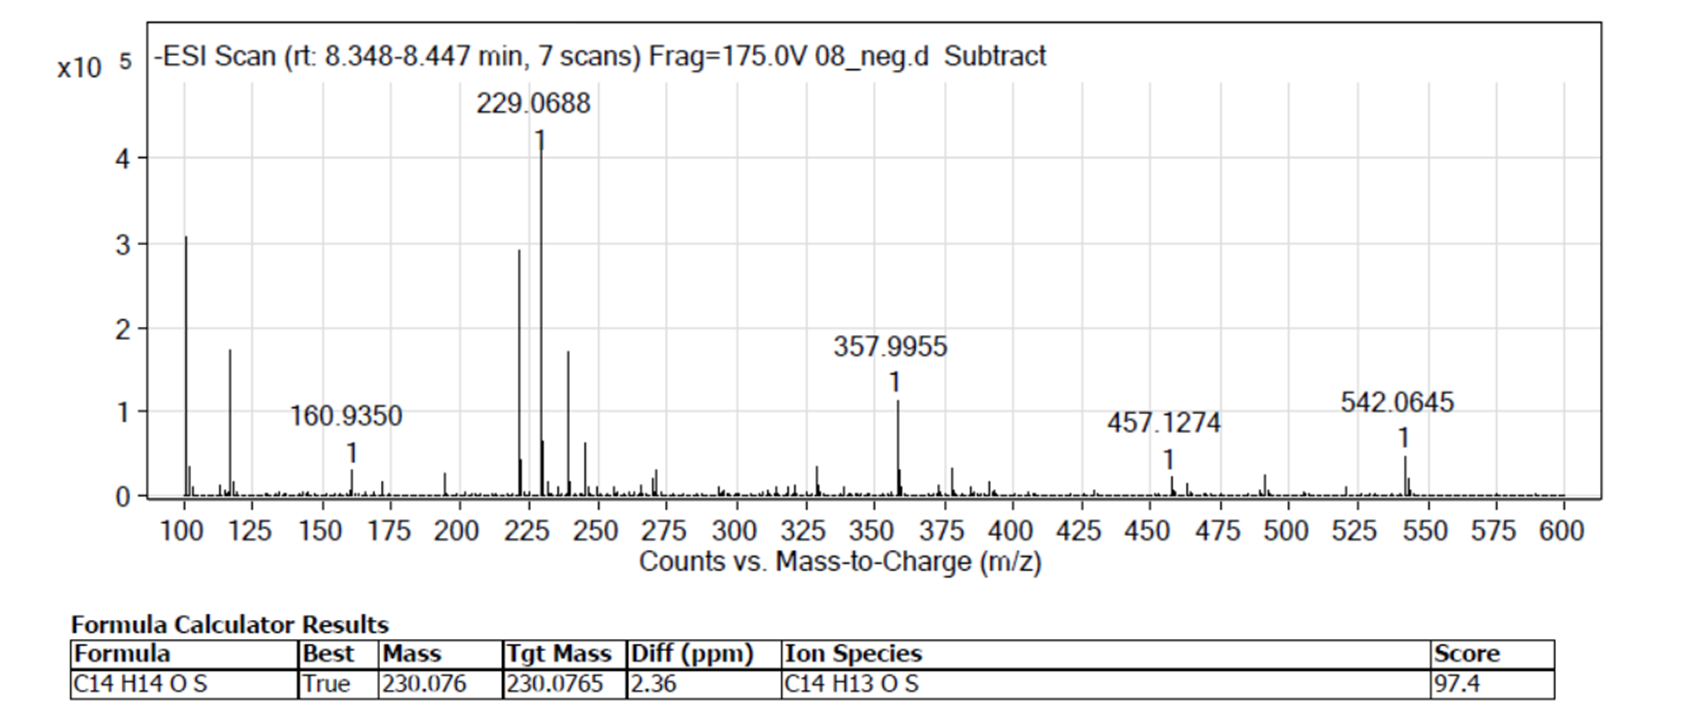


**Figure S65.** Mass spectrum and HRMS analysis of compound **8**.


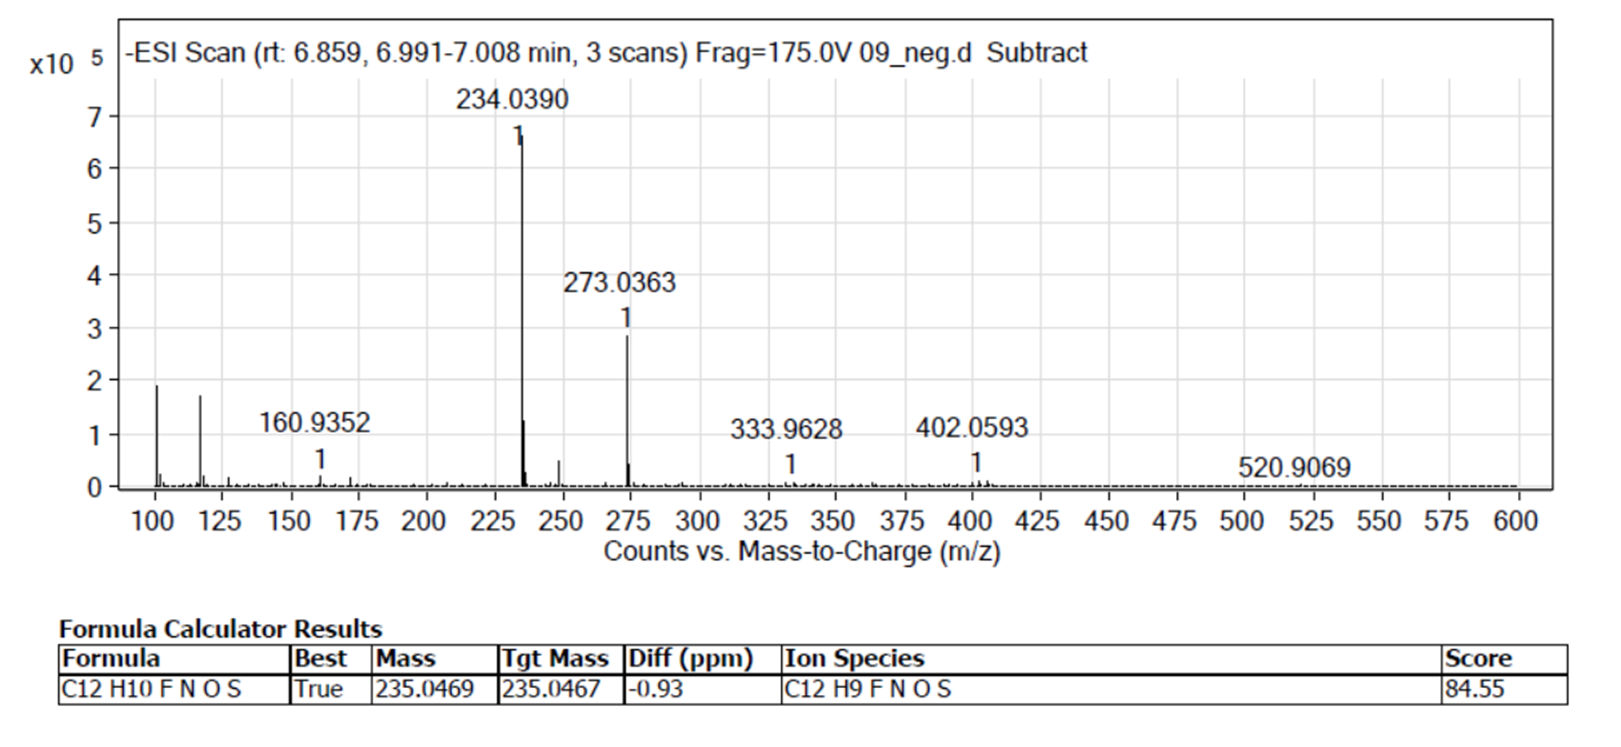


**Figure S66.** Mass spectrum and HRMS analysis of compound **9**.


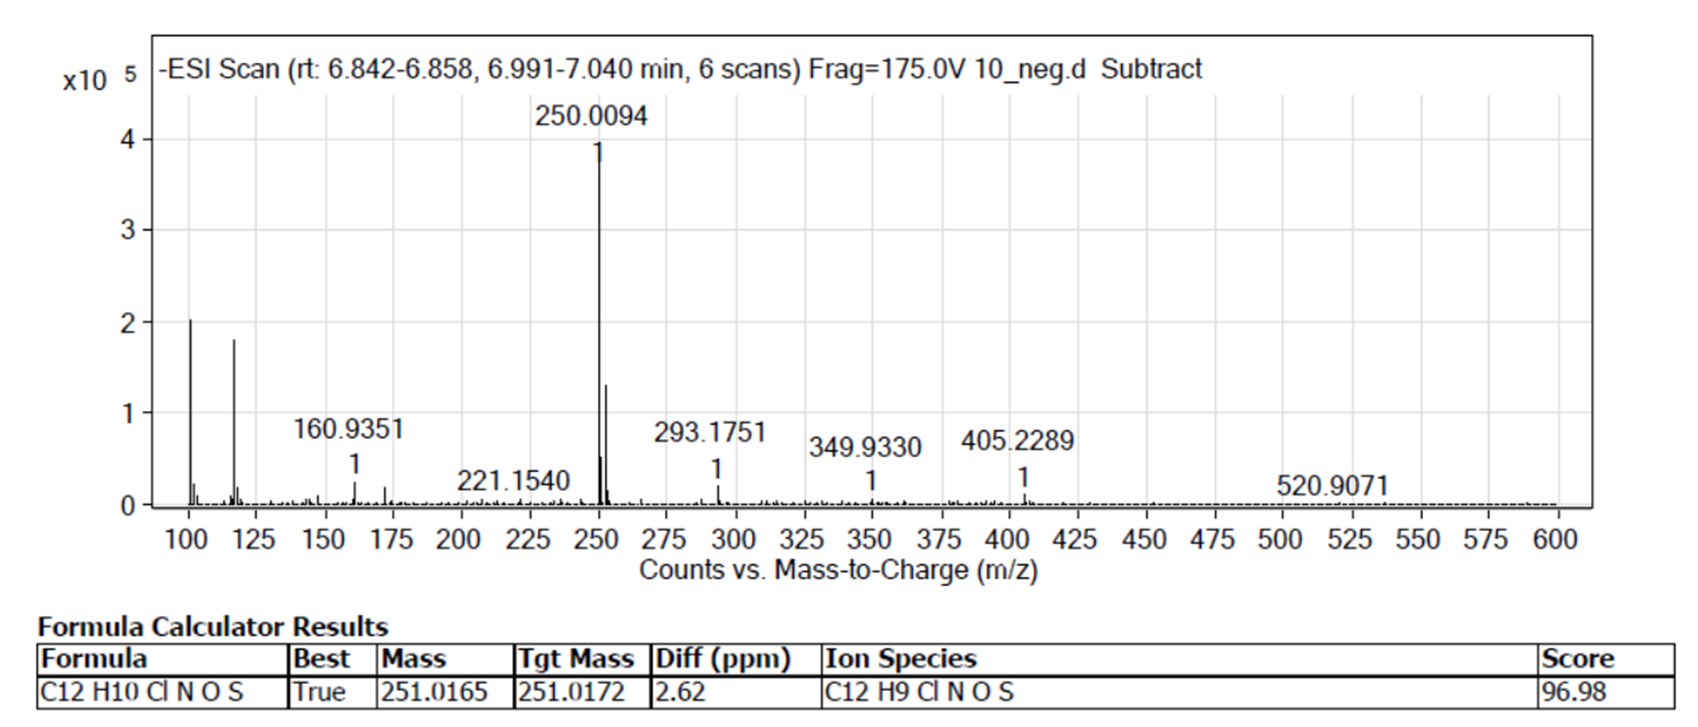


**Figure S67.** Mass spectrum and HRMS analysis of compound **10**.


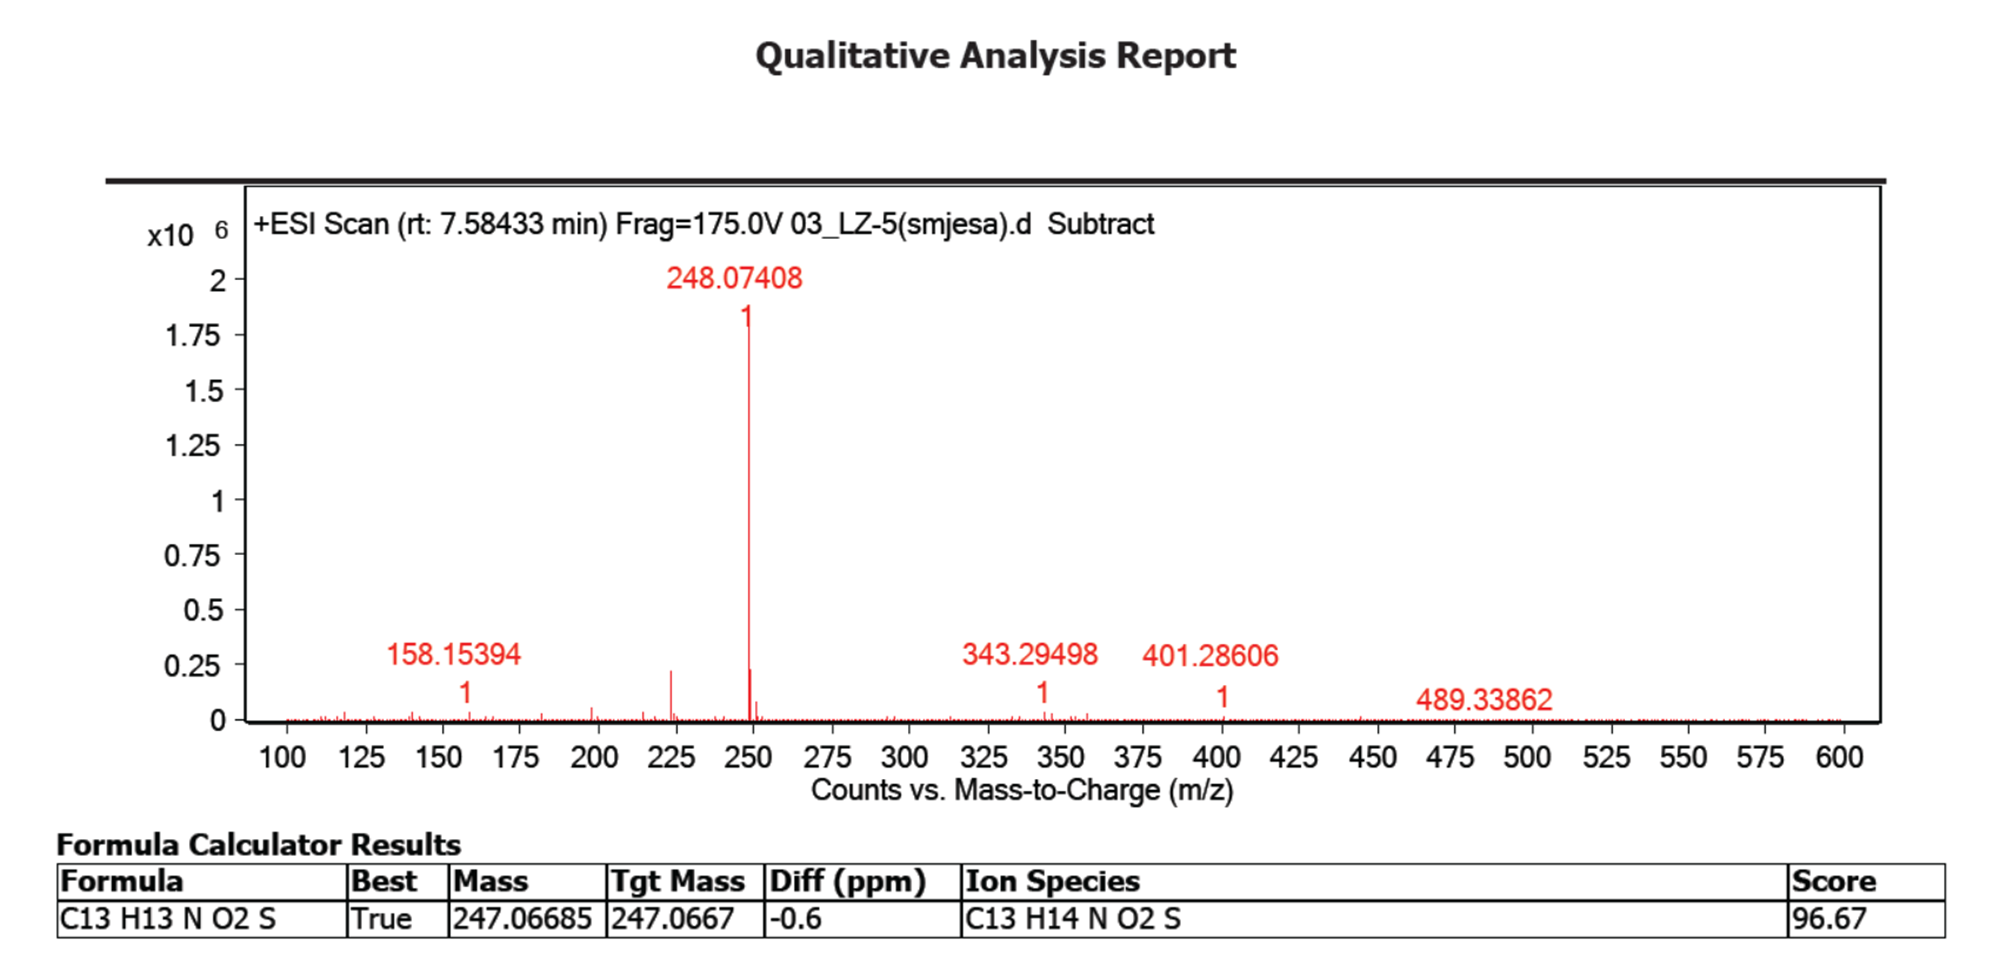


**Figure S68.** Mass spectrum and HRMS analysis of compound **11**.


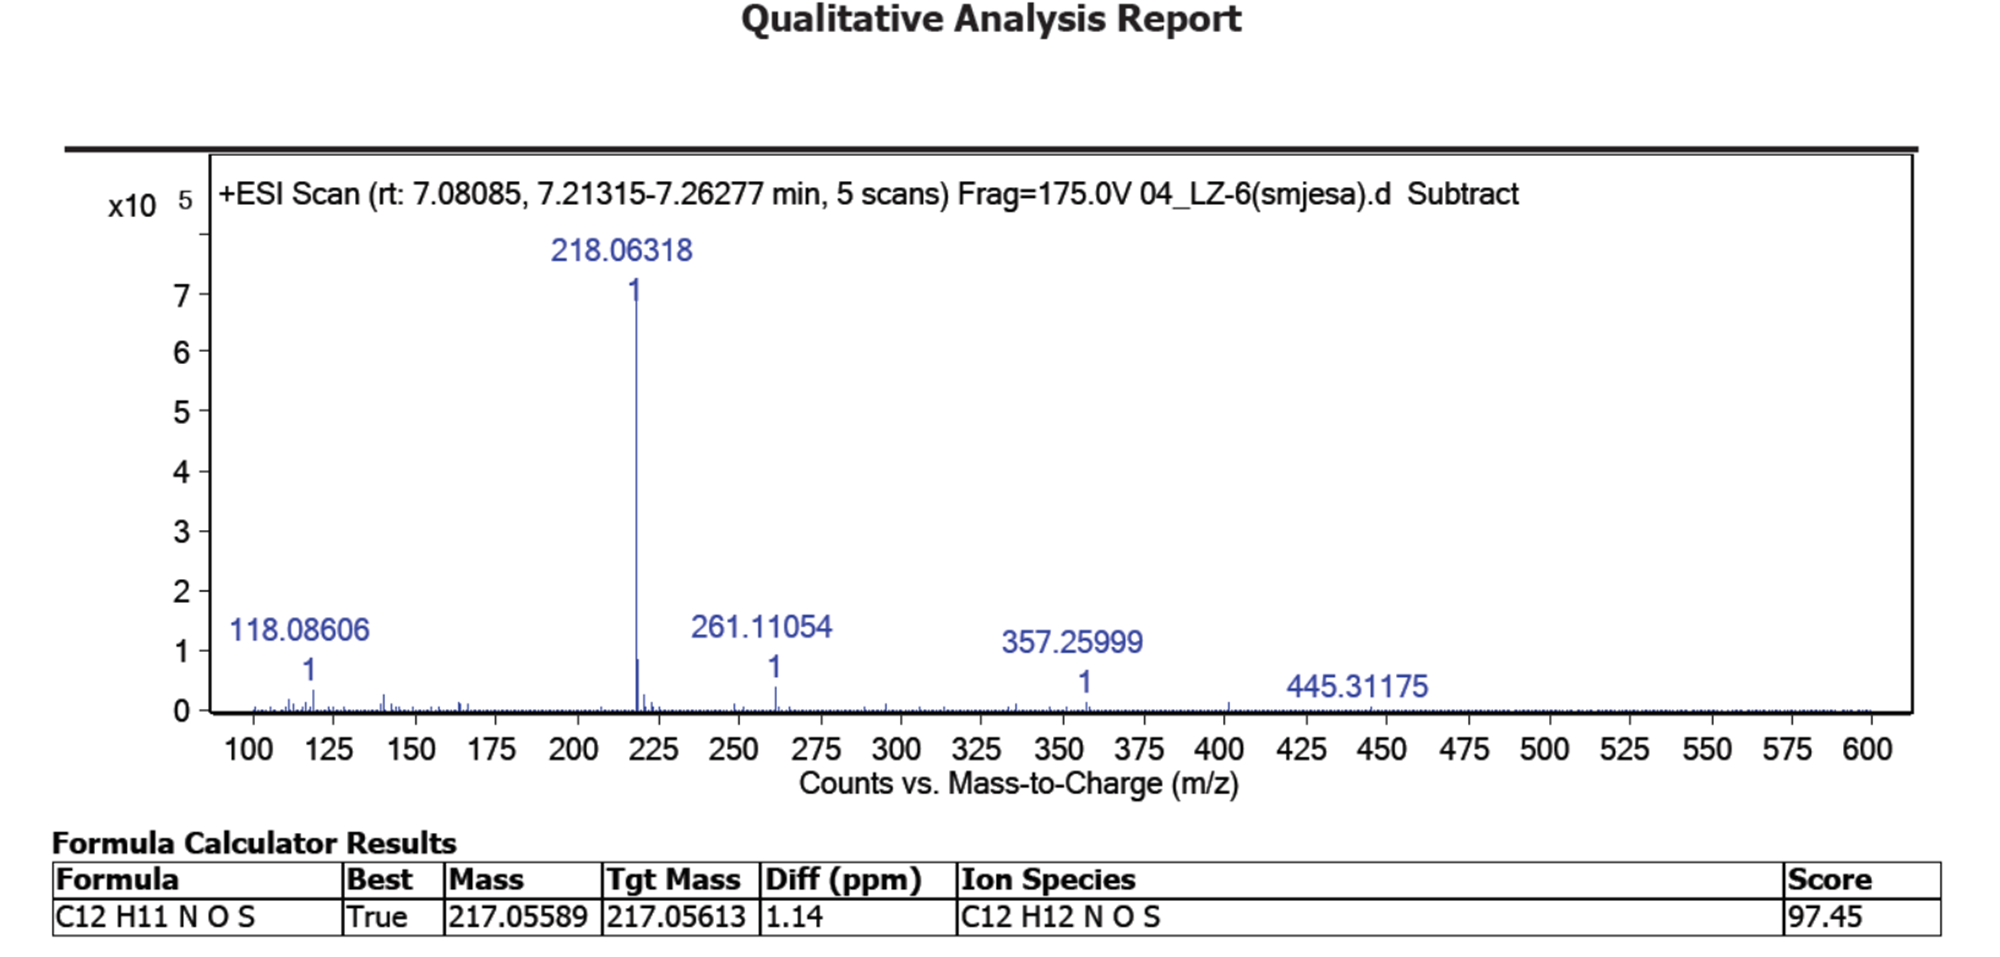


**Figure S69.** Mass spectrum and HRMS analysis of compound **12**.


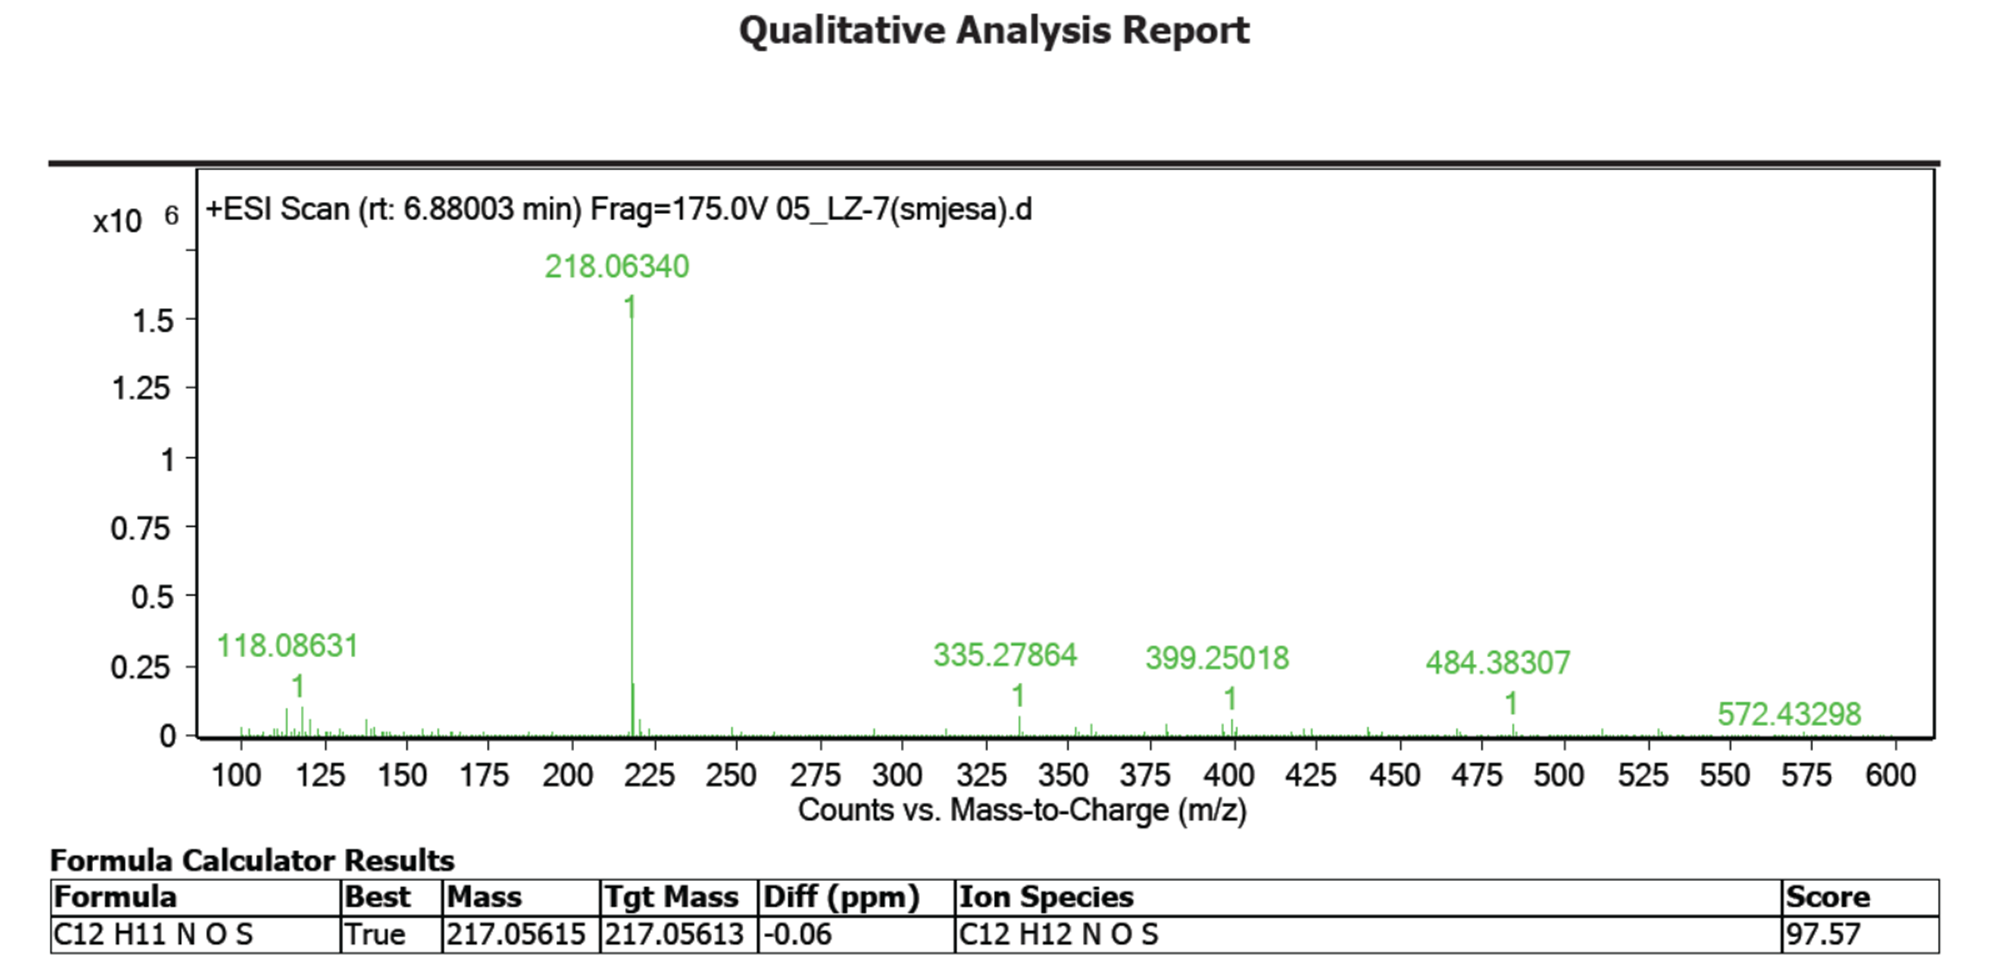


**Figure S70.** Mass spectrum and HRMS analysis of compound **13**.


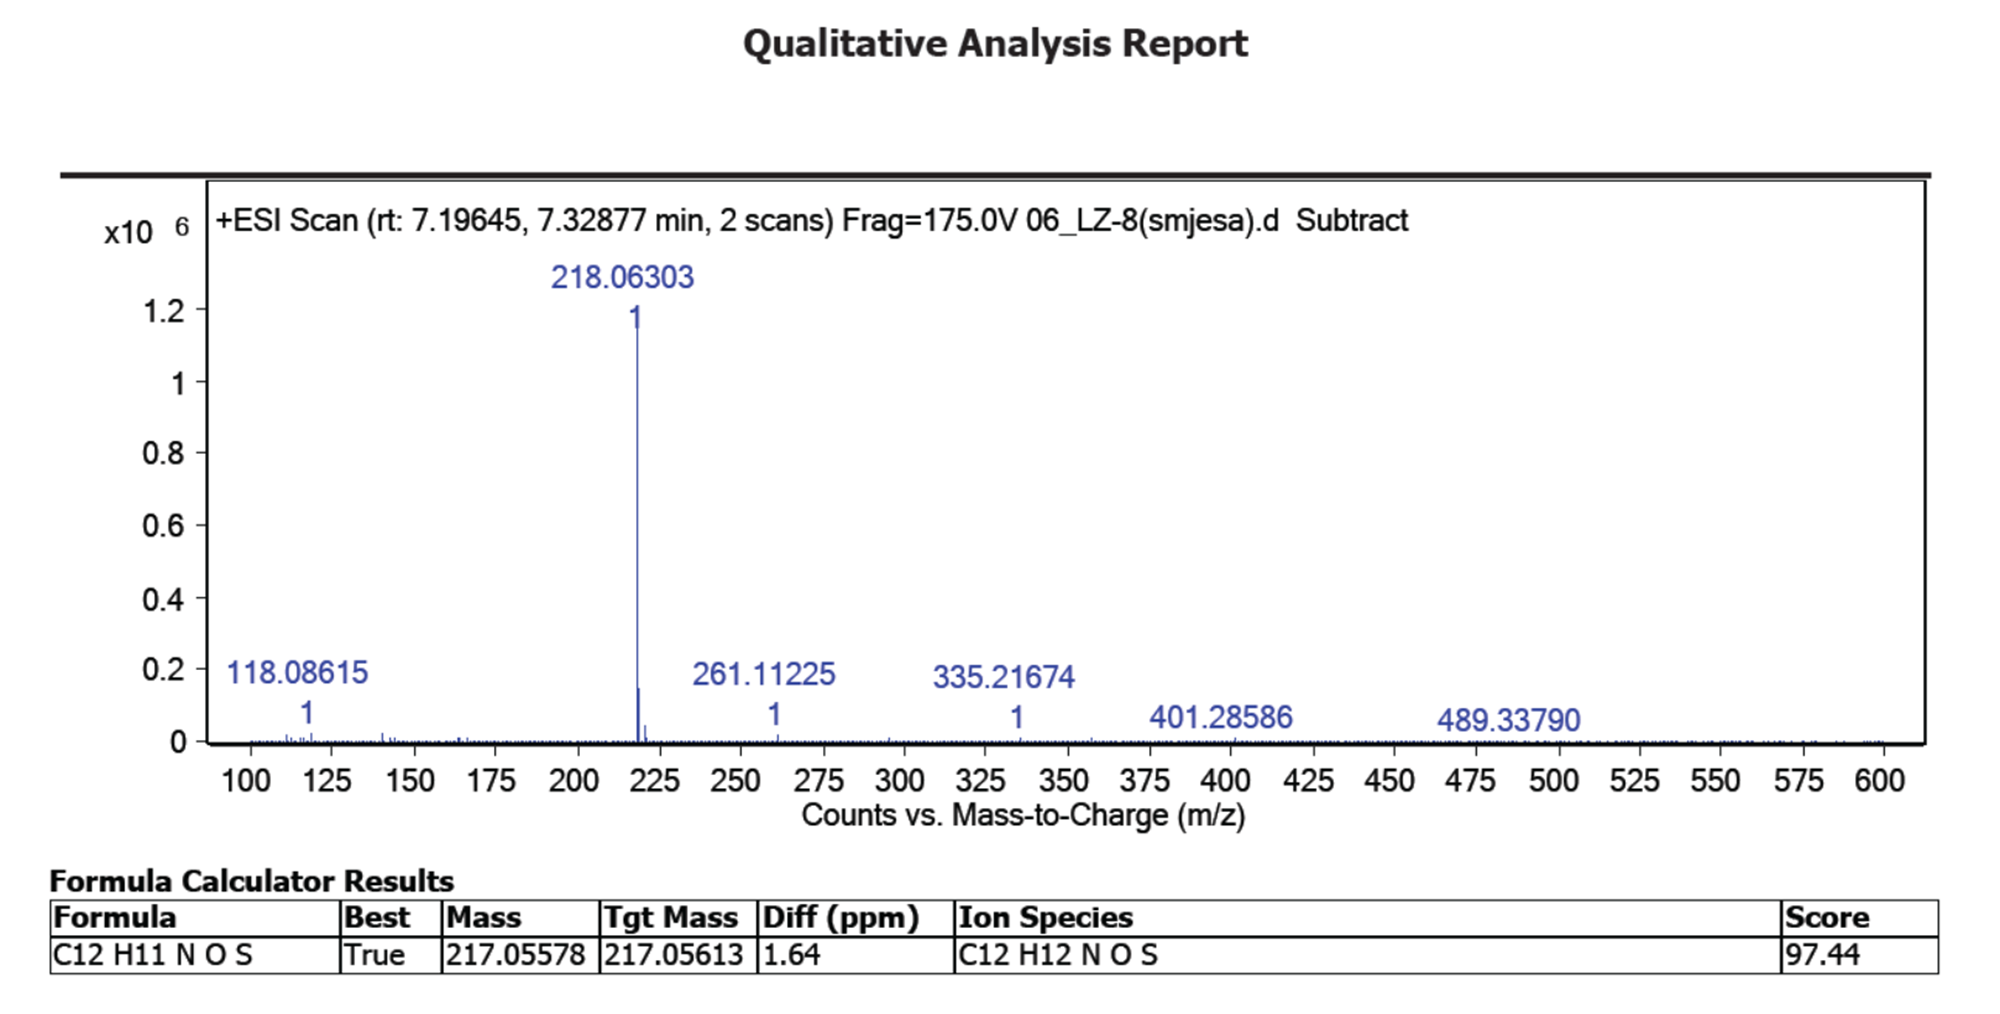


**Figure S71.** Mass spectrum and HRMS analysis of compound **14**.

1. UV spectra of compounds


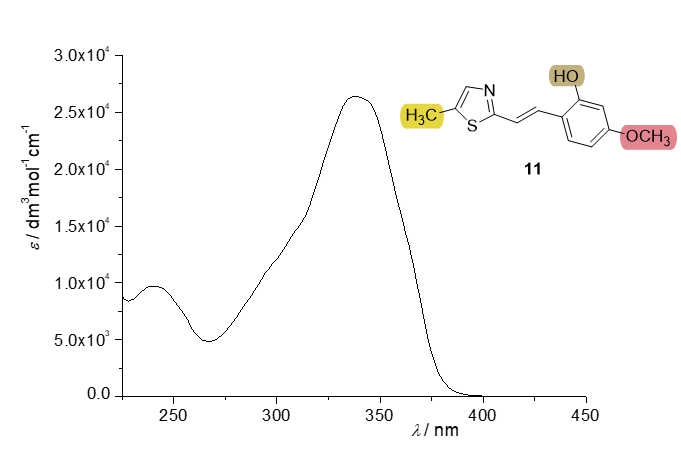

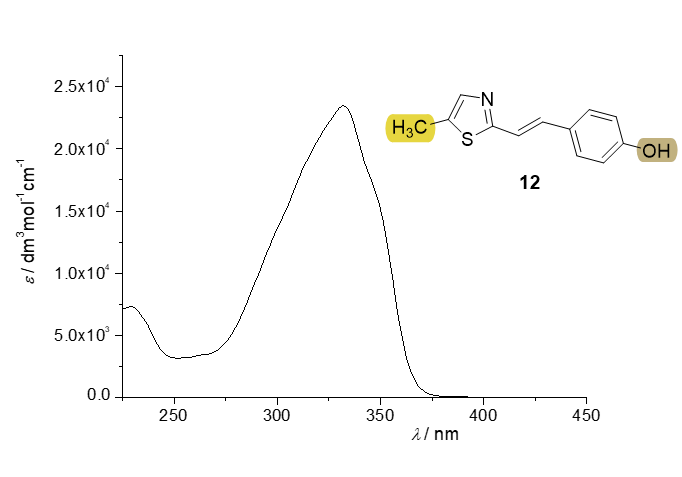


**Figure S72.** UV (ACN) spectrum of **11**. **Figure S73.** UV (ACN) spectrum of **12**.


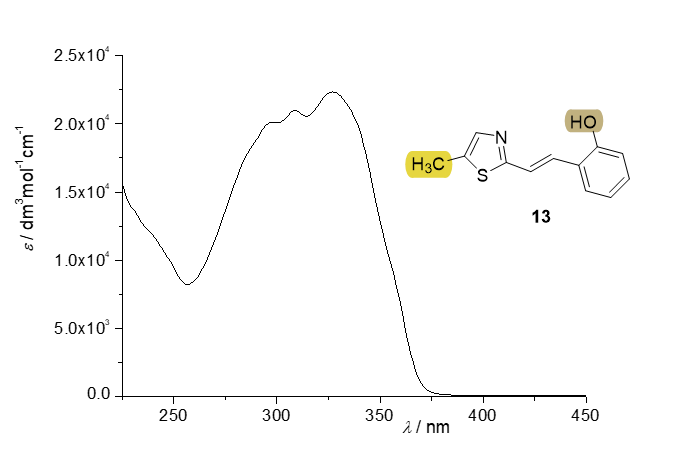

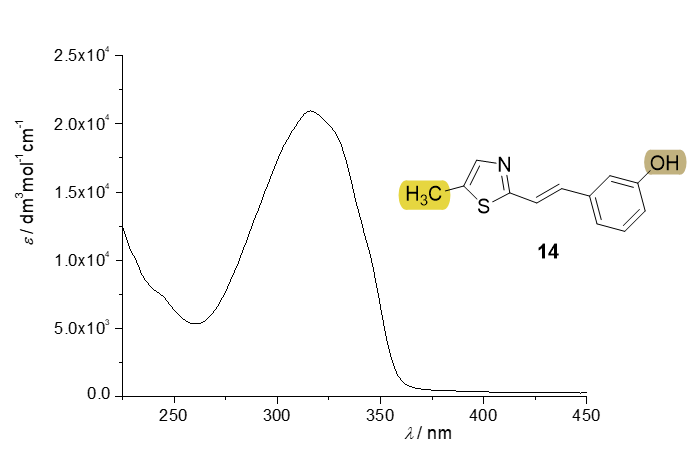


**Figure S74.** UV (ACN) spectrum of **13**. **Figure S75.** UV (ACN) spectrum of **14**.

1. Cartesian coordinates of docked ligands

**Cartesian coordinates of docked ligands**

Molecule **6** docked to AChE

S -14.706000 -41.403000 23.885000

C -14.932000 -42.979000 24.636000

C -15.977000 -43.639000 24.023000

H -16.309000 -44.648000 24.321000

C -16.587000 -42.901000 22.972000

H -17.435000 -43.284000 22.380000

C -16.023000 -41.669000 22.763000

C -16.402000 -40.630000 21.752000

H -17.241000 -40.799000 21.037000

H -15.491000 -40.375000 21.161000

H -16.598000 -39.676000 22.294000

C -14.128000 -43.478000 25.727000

H -13.129000 -43.030000 25.861000

C -14.492000 -44.447000 26.601000

H -15.497000 -44.873000 26.440000

C -13.749000 -45.009000 27.724000

C -12.516000 -45.632000 27.442000

H -12.162000 -45.672000 26.398000

C -11.735000 -46.197000 28.442000

Cl -10.205000 -46.961000 28.020000

C -12.147000 -46.167000 29.772000

H -11.526000 -46.616000 30.565000

C -13.361000 -45.557000 30.077000

H -13.701000 -45.525000 31.126000

C -14.157000 -44.985000 29.082000

O -15.348000 -44.388000 29.394000

H -15.839000 -44.967000 29.998000

Molecule **5** docked to BChE

C 133.326000 117.379000 37.076000

H 133.541000 117.497000 36.001000

C 133.127000 116.154000 37.674000

S 132.802000 116.371000 39.390000

C 132.951000 118.112000 39.266000

C 133.229000 118.479000 37.975000

H 133.365000 119.528000 37.662000

C 132.776000 118.990000 40.468000

H 132.550000 118.691000 41.518000

H 131.985000 119.725000 40.189000

H 133.703000 119.607000 40.525000

C 133.170000 114.863000 37.023000

H 133.446000 114.000000 37.652000

C 132.905000 114.607000 35.718000

H 132.644000 115.477000 35.092000

C 132.926000 113.305000 35.045000

C 132.603000 113.123000 33.679000

C 132.666000 111.856000 33.095000

H 132.419000 111.736000 32.027000

C 133.037000 110.744000 33.844000

H 133.108000 109.748000 33.376000

C 133.316000 110.916000 35.196000

F 133.657000 109.840000 35.942000

C 133.254000 112.161000 35.799000

H 133.463000 112.258000 36.878000

O 132.200000 114.153000 32.873000

H 131.277000 114.370000 33.094000

Molecule **8** docked to BChE

C 133.606000 116.497000 41.719000

H 133.877000 115.594000 42.291000

C 134.584000 117.089000 40.894000

C 134.236000 118.284000 40.223000

C 132.946000 118.807000 40.342000

H 132.679000 119.734000 39.807000

C 131.997000 118.168000 41.130000

H 130.978000 118.584000 41.195000

C 132.313000 117.001000 41.845000

C 131.283000 116.317000 42.713000

H 130.248000 116.720000 42.814000

H 131.712000 116.211000 43.737000

H 131.207000 115.254000 42.384000

C 135.905000 116.461000 40.801000

H 136.326000 116.359000 39.786000

C 136.671000 115.990000 41.817000

H 136.254000 116.077000 42.834000

C 137.981000 115.385000 41.699000

S 139.484000 116.250000 42.000000

C 140.450000 114.831000 41.652000

C 139.644000 113.774000 41.322000

H 140.035000 112.776000 41.063000

C 141.947000 114.877000 41.729000

H 142.562000 113.974000 41.507000

H 142.230000 115.249000 42.741000

H 142.302000 115.706000 41.074000

C 138.256000 114.083000 41.345000

H 137.471000 113.347000 41.102000

O 135.123000 118.990000 39.458000

H 134.857000 119.926000 39.472000

1. **Tables S1** and **S2**, free energies of binding obtained by docking

Table S1. Free energy of binding, D*G*bind, estimated by molecular docking of molecule **6** into the active site of AChE (4EY7.pdb), along with the number of conformational clusters, distribution of conformations, and docking results of the reference compound donepezil and galantamine.

| Ligand | D*G*bind/kcal mol−1  lowest highest | | Number of distinctive conformational clusters | Distribution of conformations within clusters with *n* > 1 (*n* = cluster population) |
| --- | --- | --- | --- | --- |
| **6** | −8.28 | −8.06 | 2 | 20, 5 |
| Donepezil | −11.37 | −10.75 | 4 | 22 |
| Galantamine | −10.11 | −10.10 | 1 | 25 |

Table S2. Free energies of binding, D*G*bind, obtained by molecular docking of listed molecules into the active site of BChE (1P0I.pdb), along with the number of conformational clusters, distribution of conformations, and docking results of the reference compounds donepezil and galantamine.

| Ligand | D*G*bind/kcal mol−1  lowest highest | | Number of distinctive conformational clusters | Distribution of conformations within clusters with *n* > 1 (*n* = cluster population) |
| --- | --- | --- | --- | --- |
| **5** | −7.09 | −7.01 | 2 | 22, 3 |
| **8** | −7.26 | −7.19 | 3 | 20, 2, 3 |
| Donepezil | −9.58 | −8.29 | 3 | 9, 8, 4 |
| Galantamine | −7.49 | −7.44 | 1 | 25 |

1. Docked molecule **6**

**
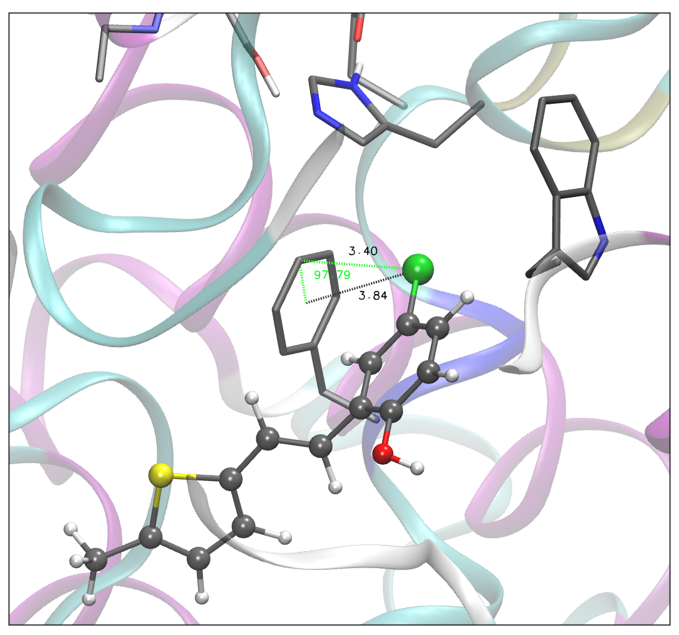
**

**Figure S76.** Molecule **6** docked into the active site of AChE, demonstrating an „edge-on“ dispersive interaction between the ligand's chlorine atom and Phe338.
